# Supplementary material for: Lanthanide(iii) (Er/Ho) coordination polymers for a photocatalytic CO2 cycloaddition reaction
Source: Royal Society of Chemistry journal article supplement (doi:10.1039/d3dt01269g), 2023-01-01
Supplement: d3dt01269g1.pdf [file d3dt01269g1.pdf]

## Supporting Information

### Lanthanides (III) (Er/Ho) coordination polymers for photocatalytic CO<sub>2</sub> cycloaddition reaction

Reem H. Alzard,<sup>a</sup> Lamia A. Siddig,<sup>a</sup> Abdalla S. Abdelhamid,<sup>a</sup> Alejandro Perez Paz,<sup>a</sup> Ha L. Nguyen,<sup>b,c</sup> K. Sethupathi,<sup>d</sup> P. K. Sreejith,<sup>d</sup> and Ahmed Alzamly<sup>a\*</sup>

<sup>a</sup>Department of Chemistry, UAE University, P.O. Box 15551, Al-Ain, UAE

<sup>b</sup>Department of Chemistry, University of California Berkeley; Kavli Energy Nanoscience Institute at UC Berkeley; and Berkeley Global Science Institute, Berkeley, California 94720, United States

<sup>c</sup>Joint UAEU–UC Berkeley Laboratories for Materials Innovations, United Arab Emirates University, Al-Ain 15551, United Arab Emirates

<sup>d</sup>Low temperature Physics Laboratory, Department of Physics, Indian Institute of Technology Madras, Chennai 600036, India

## TABLE OF CONTENTS

|                                                                                                       |            |
|-------------------------------------------------------------------------------------------------------|------------|
| <b>Section 1: Characterization of Ln-CPs.....</b>                                                     | <b>S3</b>  |
| Powder X-ray Diffraction (PXRD) for Ln-CPs prepared at different ratios.....                          | S3         |
| Energy-dispersive X-ray spectroscopy (EDX).....                                                       | S4         |
| Thermogravimetric analysis of Ln-CPs .....                                                            | S6         |
| Chemical stability of Ln-CPs in different solvents.....                                               | S7         |
| UV–Vis Diffuse-reflectance data of Ln-CPs.....                                                        | S11        |
| <b>Section 2: Crystallographic details of Ln-CPs .....</b>                                            | <b>S12</b> |
| Crystal details of Er-CP .....                                                                        | S12        |
| Crystal details of Ho-CP .....                                                                        | S22        |
| <b>Section 3: Photocatalytic studies .....</b>                                                        | <b>S32</b> |
| <sup>1</sup> H-NMR analysis of the photocatalytic reactions over Ln-CPs photocatalysts .....          | S32        |
| <sup>13</sup> C-NMR analysis of the photocatalytic reactions over Ln-CPs photocatalysts .....         | S35        |
| PXRD patterns of recycled Ln-CPs photocatalysts.....                                                  | S38        |
| SEM images of recycled Ln-CPs photocatalysts.....                                                     | S39        |
| Summary of previously published photocatalysts used in CO <sub>2</sub> cycloaddition<br>reaction..... | S40        |
| References.....                                                                                       | S41        |

## Section 1: Characterization of Ln-CPs

Powder X-ray Diffraction (PXRD) for Ln-CPs prepared at different ratios

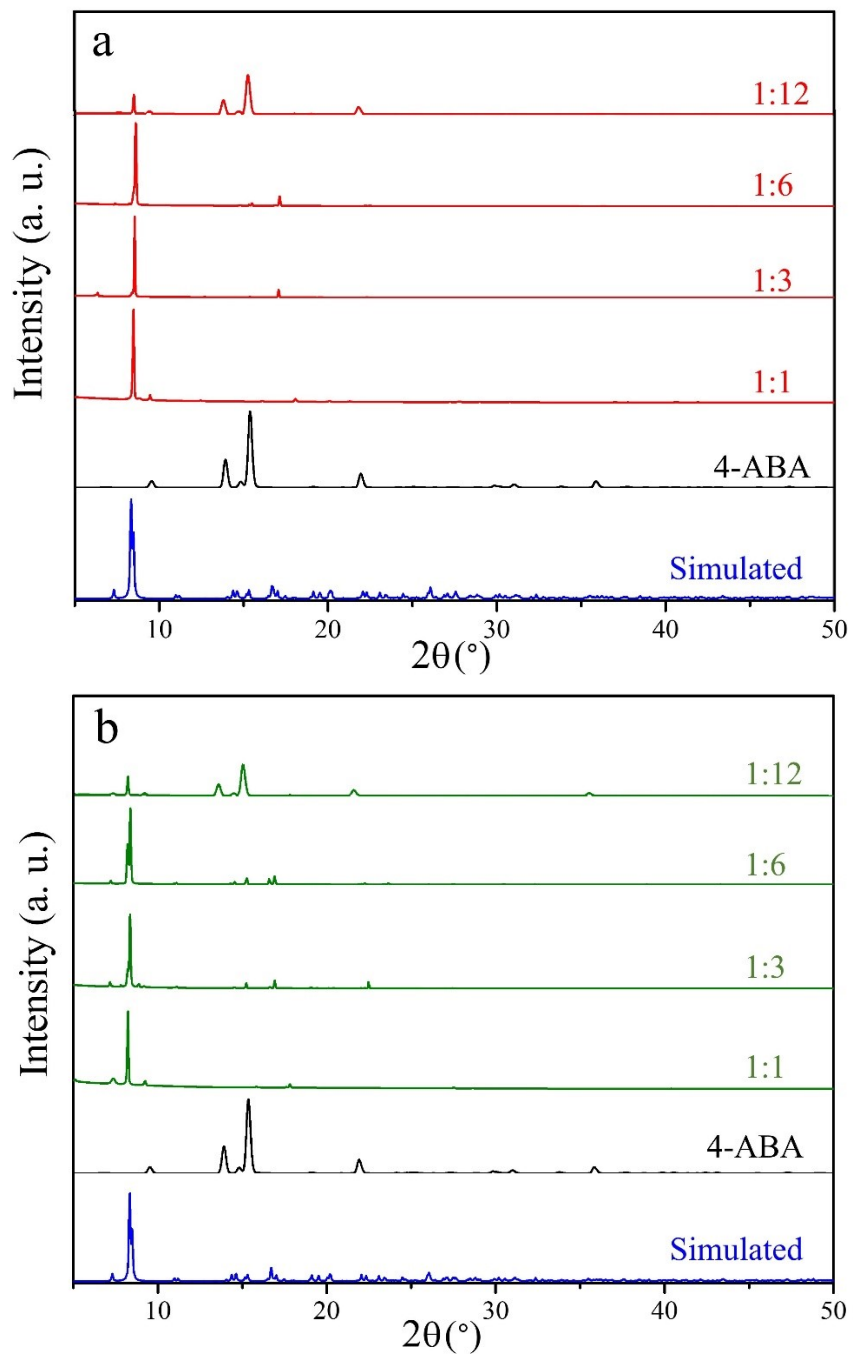

Figure S1. PXRD patterns of (a) Ho-CP and (b) Er-CP prepared at different ratios compared to the simulated pattern and 4-ABA starting material.



Energy-dispersive X-ray spectroscopy (EDX)

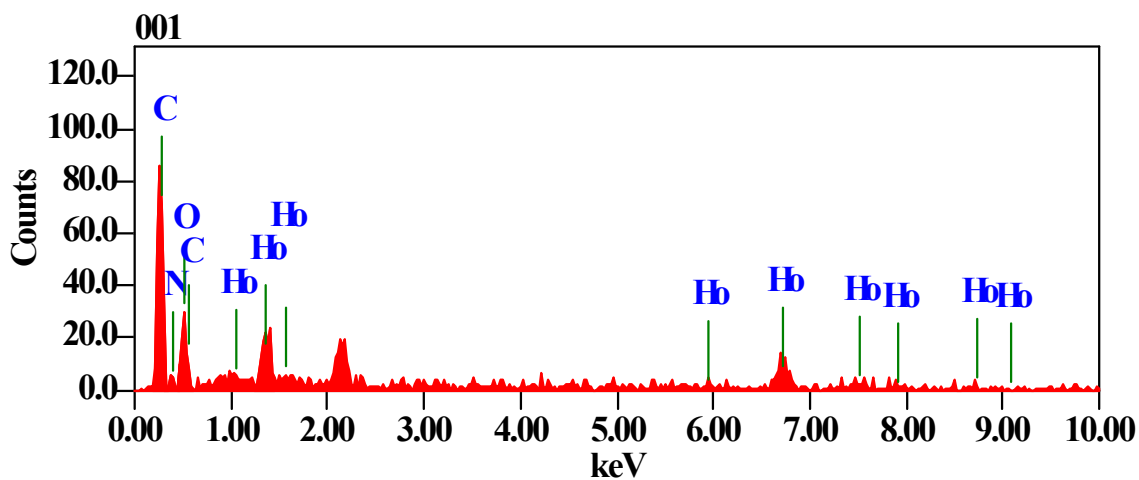

Figure S2. EDX spectrum of Ho-CP indicating the presence of Ho, N, O, and C atoms in the sample.

Table S1. Average weight and atomic percentages of Ho-CP based on EDX analysis.

| Element | Weight % | Atom % |
|---------|----------|--------|
| C       | 44.05    | 64.14  |
| O       | 15.97    | 17.50  |
| N       | 12.37    | 15.47  |
| Ho      | 27.6     | 2.93   |

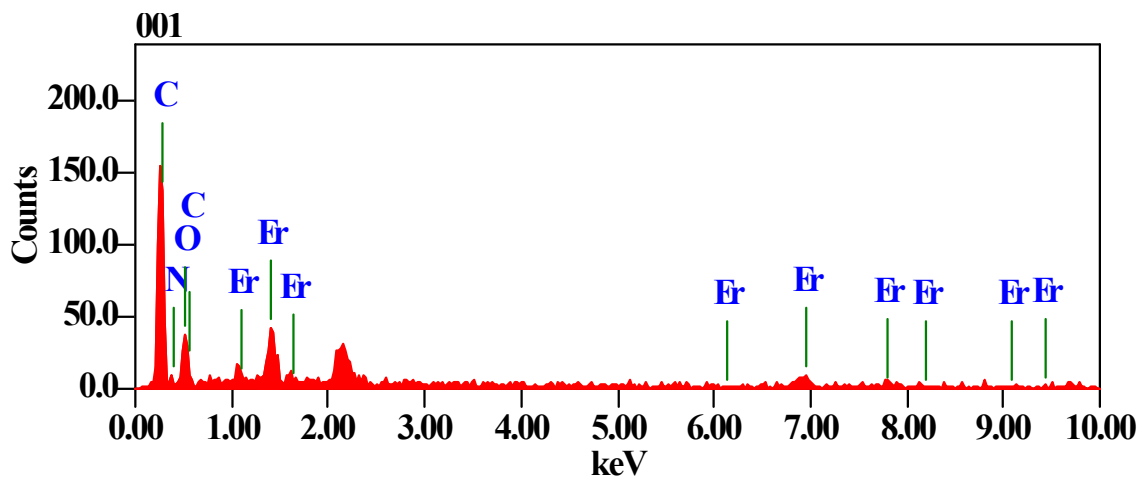

Figure S3. EDX spectrum of Er-CP indicating the presence of Er, N, O, and C atoms in the sample.

Table S2. Average weight and atomic percentages of Er-CP based on EDX analysis.

| Element | Weight % | Atom % |
|---------|----------|--------|
| C       | 44.83    | 66.71  |
| O       | 14.97    | 13.39  |
| N       | 10.50    | 16.72  |
| Er      | 29.3     | 3.17   |

Thermogravimetric analysis of Ln-CPs

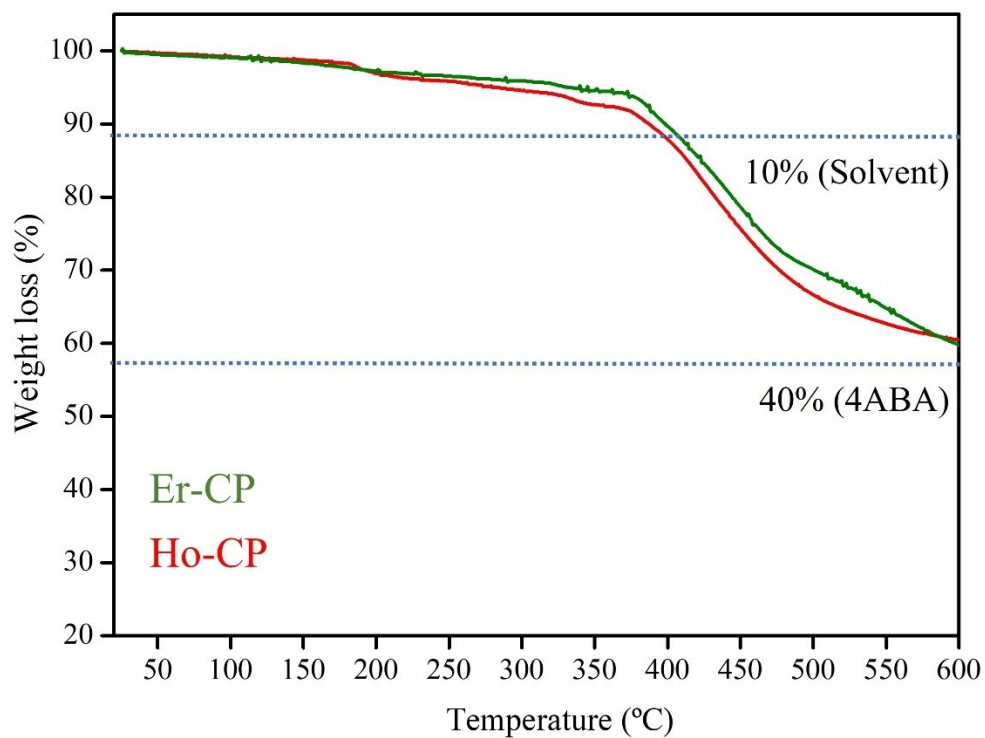

Figure S4. Thermogravimetric analysis of Ln-CPs. The blue lines indicate percentages corresponding to the solvent and organic linker losses.

Chemical stability of Ln-CPs in different solvents

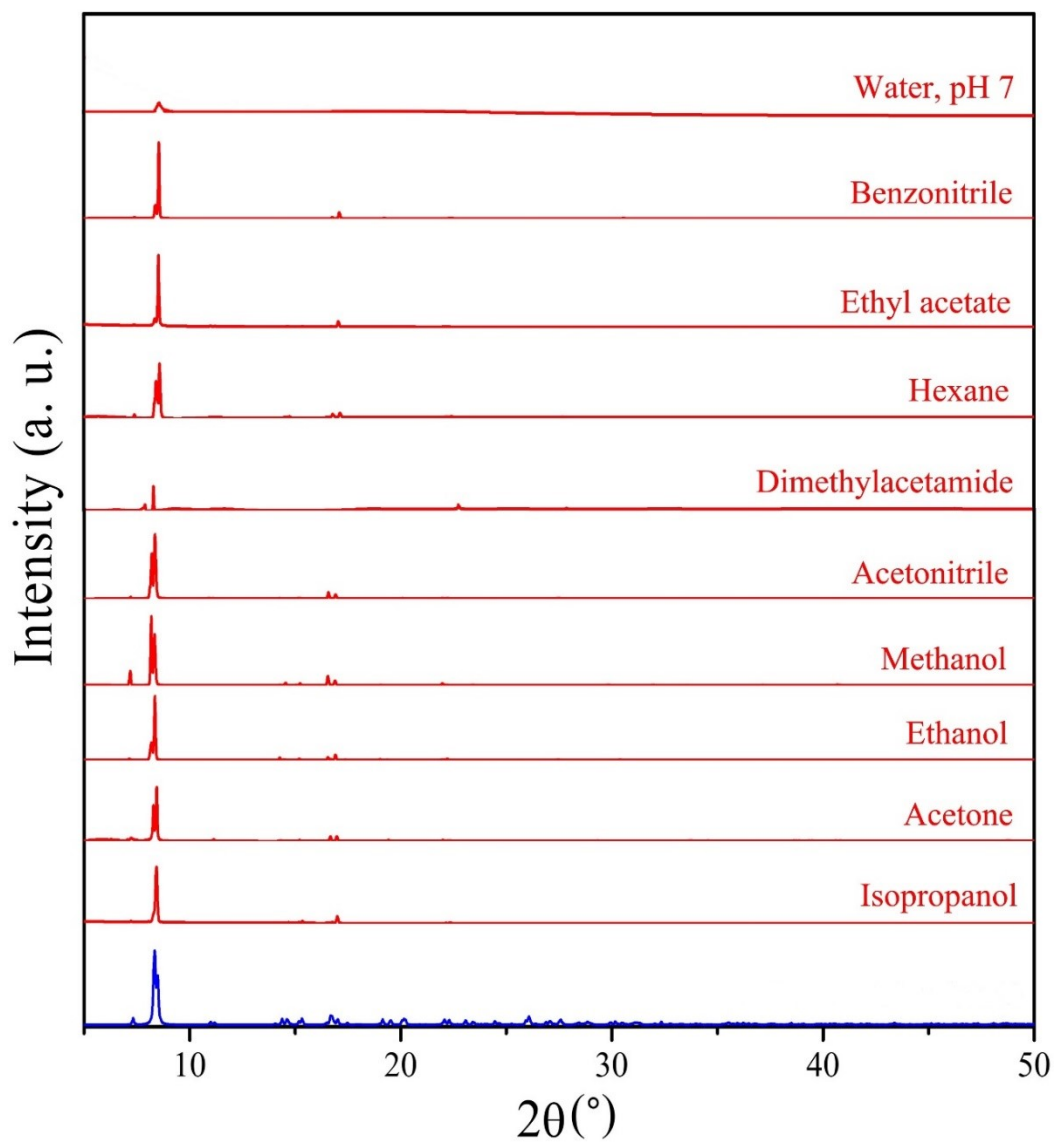

Figure S5. Powder X-ray diffraction patterns of Ho-CP (1:6 ratio) after being immersed in various solvents for 24 hours.



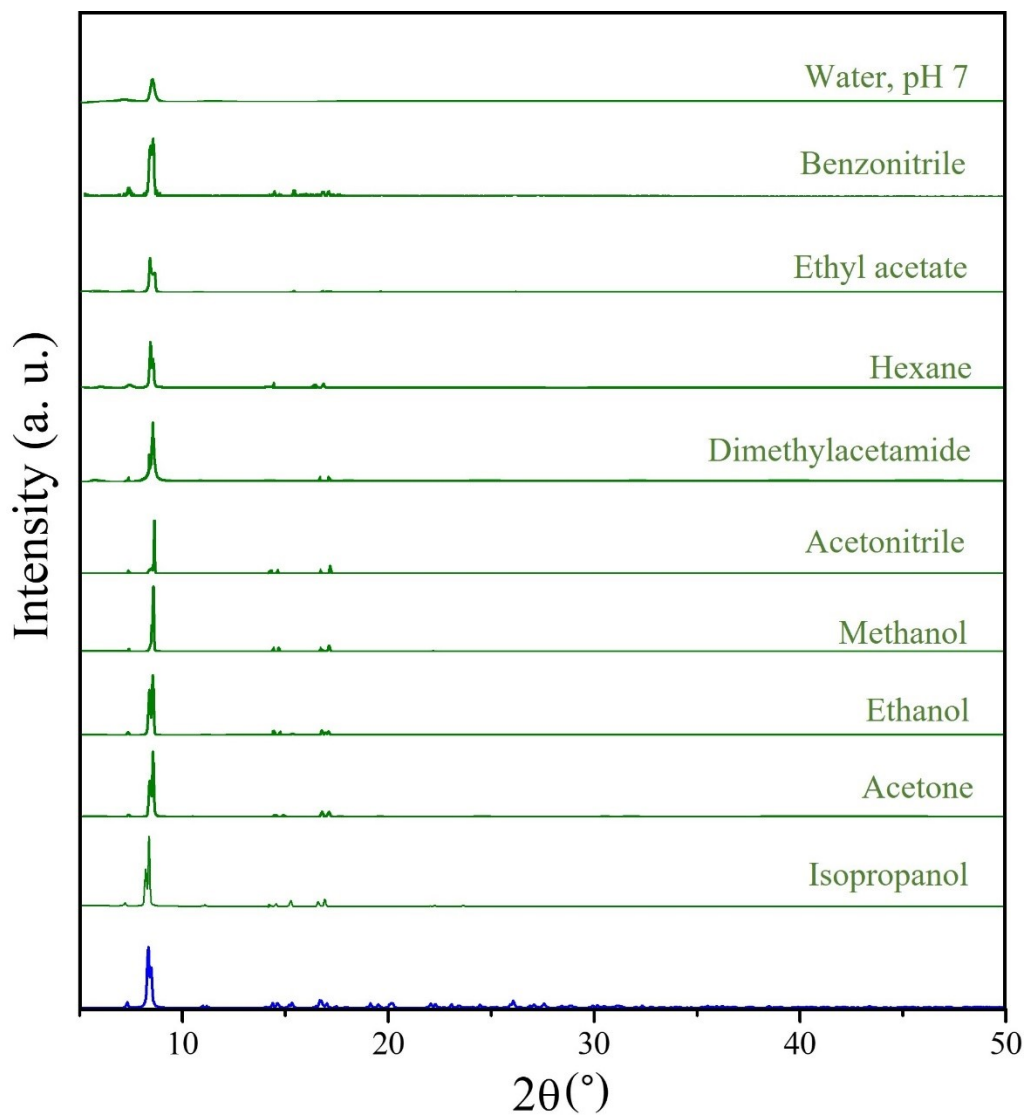

Figure S6. Powder X-ray diffraction patterns of Er-CP (1:6 ratio) after being immersed in various solvents for 24 hours.

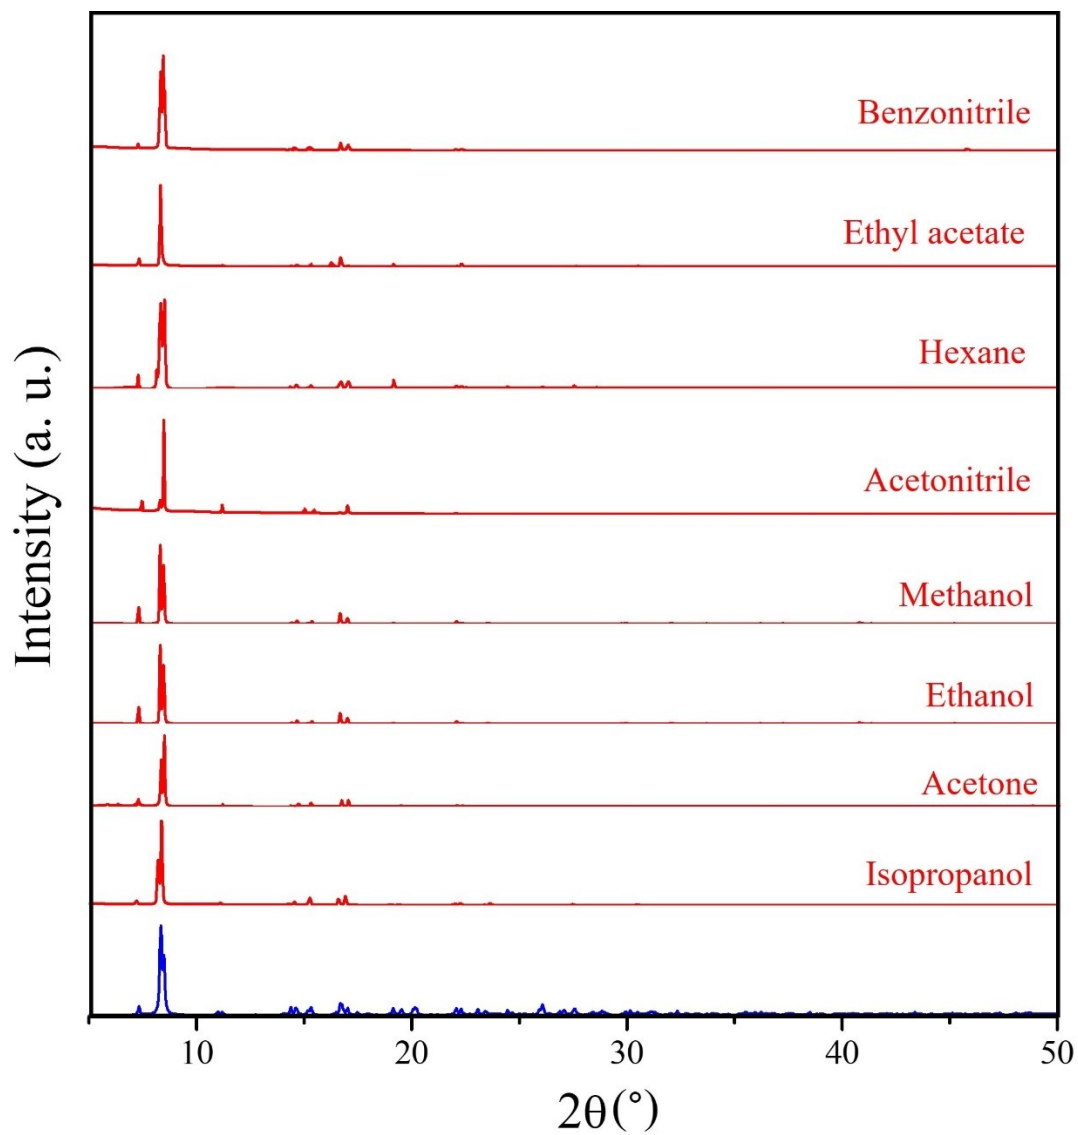

Figure S7. Powder X-ray diffraction patterns of Ho-CP (1:6 ratio) after being immersed in various solvents for 1 week. Patterns of the sample in H<sub>2</sub>O and dimethylacetamide were not included as sample was destructed and no diffraction peaks appeared.

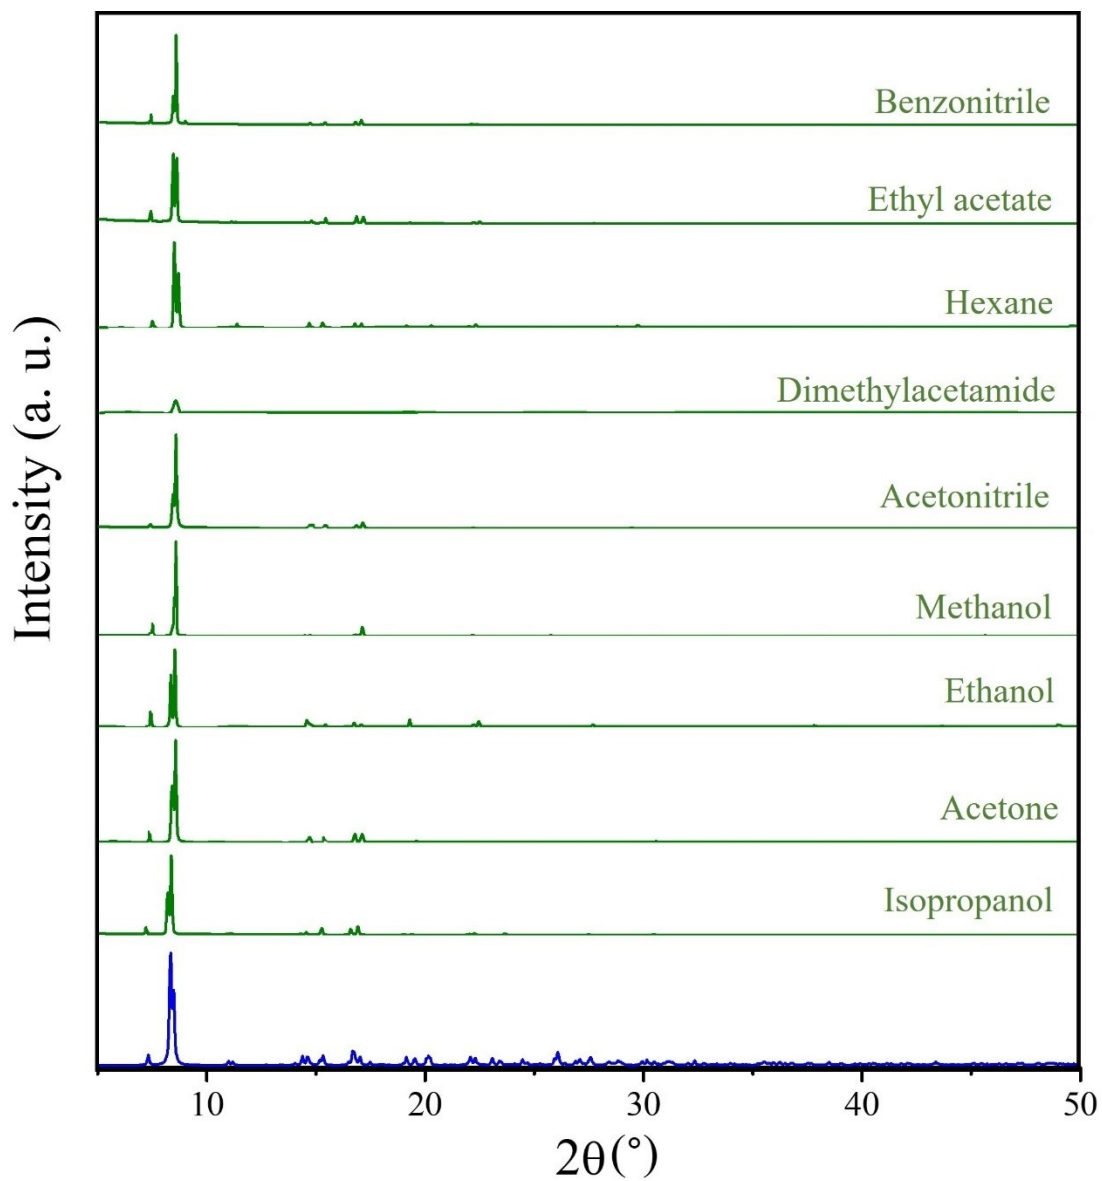

Figure S8. Powder X-ray diffraction patterns of Er-CP (1:6 ratio) after being immersed in various solvents for 1 week. Patterns of the sample in  $H_2O$  was not included as the sample was destructed and no diffraction peaks appeared.

UV-Vis Diffuse-reflectance data of Ln-CPs

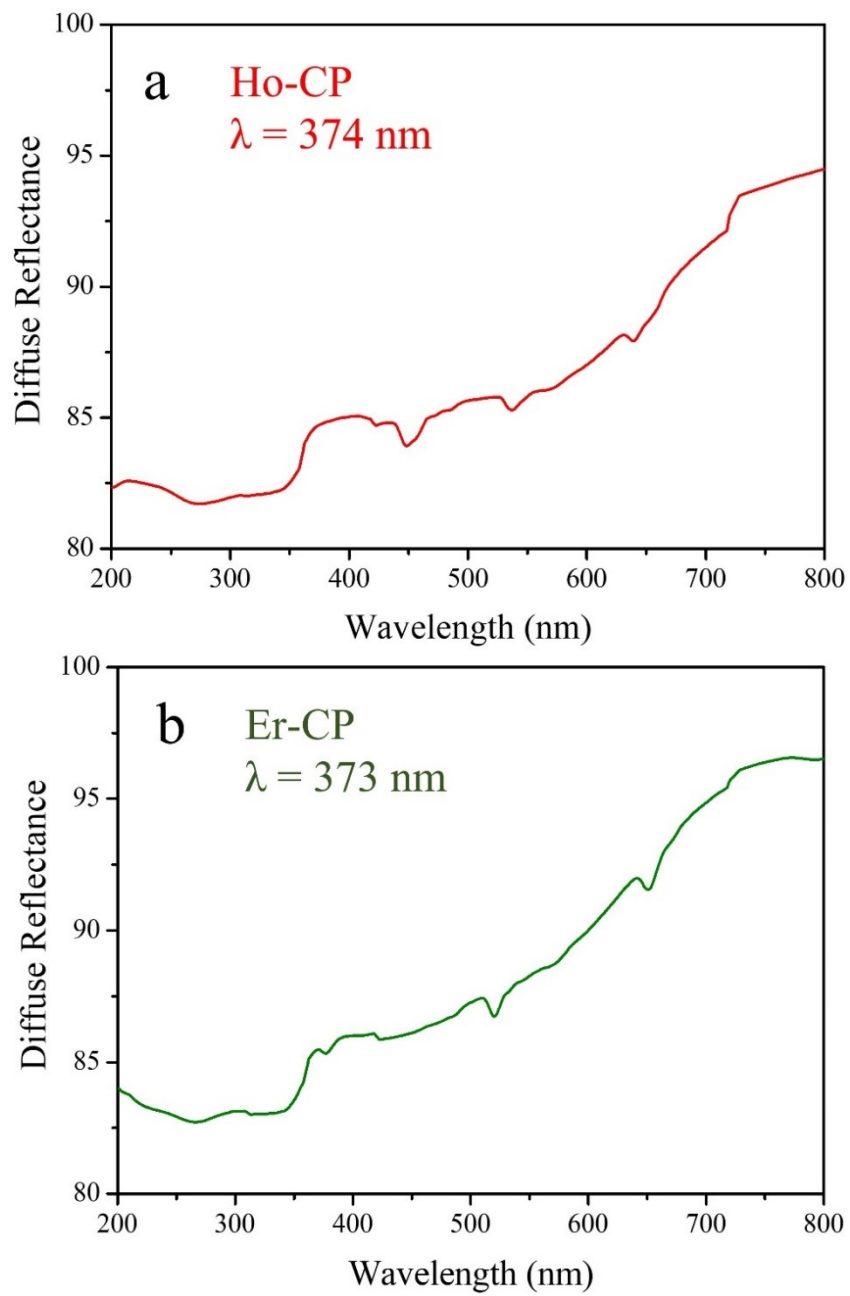

Figure S9. UV-Vis DRS spectra of Ho-CP (a) and Er-CP (b) under air atmosphere and room temperature conditions.

## Section 2: Crystallographic details

Crystal details of Er-CP

Table S3. Crystal data and structure refinement for Er-CP.

|                                                              |                                                                                |
|--------------------------------------------------------------|--------------------------------------------------------------------------------|
| Identification code                                          | Er-CP, Deposition Number 2180346                                               |
| Empirical formula                                            | C <sub>42</sub> H <sub>36</sub> Er <sub>2</sub> N <sub>6</sub> O <sub>12</sub> |
| Formula weight                                               | 1151.29                                                                        |
| Temperature/K                                                | 297.00(10)                                                                     |
| Crystal system                                               | triclinic                                                                      |
| Space group                                                  | <i>P</i> -1                                                                    |
| <i>a</i> /Å                                                  | 7.87907(16)                                                                    |
| <i>b</i> /Å                                                  | 12.1676(3)                                                                     |
| <i>c</i> /Å                                                  | 21.2187(5)                                                                     |
| $\alpha$ /°                                                  | 88.844(2)                                                                      |
| $\beta$ /°                                                   | 89.7102(18)                                                                    |
| $\gamma$ /°                                                  | 83.4768(18)                                                                    |
| Volume/Å <sup>3</sup>                                        | 2020.63(8)                                                                     |
| <i>Z</i>                                                     | 2                                                                              |
| $\rho_{\text{calc}}$ /g/cm <sup>3</sup>                      | 1.892                                                                          |
| $\mu$ /mm <sup>-1</sup>                                      | 8.105                                                                          |
| <i>F</i> (000)                                               | 1124.0                                                                         |
| Crystal size/mm <sup>3</sup>                                 | 0.143 × 0.061 × 0.036                                                          |
| Radiation                                                    | Cu K $\alpha$ ( $\lambda$ = 1.54184)                                           |
| 2 $\Theta$ range for data collection/°                       | 7.314 to 155.324                                                               |
| Index ranges                                                 | -8 ≤ <i>h</i> ≤ 9, -15 ≤ <i>k</i> ≤ 15, -26 ≤ <i>l</i> ≤ 25                    |
| Reflections collected                                        | 37964                                                                          |
| Independent reflections                                      | 8148 [ <i>R</i> <sub>int</sub> = 0.0514, <i>R</i> <sub>sigma</sub> = 0.0372]   |
| Data/restraints/parameters                                   | 8148/0/566                                                                     |
| Goodness-of-fit on <i>F</i> <sup>2</sup>                     | 1.104                                                                          |
| Final <i>R</i> indexes [ <i>I</i> ≥ 2 $\sigma$ ( <i>I</i> )] | <i>R</i> <sub>1</sub> = 0.0366, <i>wR</i> <sub>2</sub> = 0.0982                |
| Final <i>R</i> indexes [all data]                            | <i>R</i> <sub>1</sub> = 0.0403, <i>wR</i> <sub>2</sub> = 0.1003                |
| Largest diff. peak/hole / e Å <sup>-3</sup>                  | 1.10/-1.07                                                                     |

Table S4. Fractional Atomic Coordinates (×10<sup>4</sup>) and Equivalent Isotropic Displacement Parameters (Å<sup>2</sup>×10<sup>3</sup>) for Er-CP. *U*<sub>eq</sub> is defined as 1/3 of the trace of the orthogonalised *U*<sub>ij</sub> tensor.

| Atom | <i>x</i>   | <i>y</i>  | <i>z</i>  | <i>U</i> (eq) |
|------|------------|-----------|-----------|---------------|
| Er1  | 3565.1(3)  | 6546.8(2) | 2655.0(2) | 30.80(9)      |
| Er2  | -1534.0(3) | 7284.3(2) | 2321.6(2) | 30.82(9)      |

|     |          |          |            |          |
|-----|----------|----------|------------|----------|
| O11 | 1269(3)  | 6267(2)  | 2029.1(13) | 35.6(6)  |
| O21 | 4216(4)  | 7403(3)  | 1739.4(14) | 43.6(7)  |
| O31 | 5336(4)  | 5022(2)  | 2443.3(15) | 42.1(7)  |
| O40 | 4570(4)  | 6733(3)  | 3685.1(15) | 48.2(8)  |
| O20 | 6471(4)  | 8347(3)  | 1746.9(15) | 42.2(7)  |
| O51 | 1925(4)  | 5510(2)  | 3261.2(15) | 40.9(7)  |
| O10 | -288(4)  | 7197(3)  | 1307.0(15) | 43.8(7)  |
| O   | 6032(3)  | 7526(2)  | 2960.7(13) | 36.7(6)  |
| O50 | -754(4)  | 6324(3)  | 3199.1(16) | 49.5(8)  |
| O30 | 7531(4)  | 5725(2)  | 1997.3(18) | 49.3(8)  |
| O61 | 1941(5)  | 8083(3)  | 2868(2)    | 62.0(10) |
| O60 | -548(4)  | 8923(3)  | 2562.9(17) | 49.6(8)  |
| C13 | 4151(5)  | 9016(3)  | 1097(2)    | 34.3(8)  |
| C7  | 2166(6)  | 5258(4)  | -136(2)    | 47.2(11) |
| C18 | 4680(6)  | 10066(4) | 1027(2)    | 47.0(11) |
| N32 | 9553(7)  | 638(4)   | 1407(2)    | 63.8(12) |
| C3  | 1768(5)  | 5750(3)  | 951(2)     | 35.2(8)  |
| C8  | 1407(6)  | 5957(4)  | 316(2)     | 41.2(9)  |
| C17 | 3915(6)  | 10834(4) | 605(3)     | 52.5(12) |
| C59 | 950(6)   | 8959(3)  | 2766(2)    | 42.0(10) |
| C14 | 2871(5)  | 8744(3)  | 696(2)     | 38.7(9)  |
| C24 | 6600(6)  | 2881(4)  | 2049(2)    | 44.9(10) |
| C16 | 2658(6)  | 10566(4) | 197(2)     | 44.6(10) |
| C4  | 2918(5)  | 4841(4)  | 1119(2)    | 39.5(9)  |
| C19 | 4998(5)  | 8207(3)  | 1558(2)    | 37.0(9)  |
| C23 | 7487(5)  | 3795(3)  | 1958(2)    | 36.0(8)  |
| C6  | 3283(6)  | 4334(4)  | 28(2)      | 44.9(11) |
| C5  | 3676(6)  | 4138(4)  | 665(2)     | 45.3(10) |
| C37 | 6358(6)  | 8642(4)  | 5120(2)    | 49.2(11) |
| C39 | 5612(5)  | 7425(4)  | 3547(2)    | 36.8(9)  |
| C48 | 1051(6)  | 4269(4)  | 4319(2)    | 42.5(10) |
| C53 | 1579(5)  | 10024(3) | 2901(2)    | 37.2(9)  |
| C58 | 3335(6)  | 10086(4) | 2936(2)    | 46.6(10) |
| C43 | -159(5)  | 4812(4)  | 3912(2)    | 39.7(9)  |
| C54 | 476(6)   | 10981(4) | 2997(2)    | 45.1(10) |
| N42 | 7900(7)  | 10147(4) | 5419(2)    | 66.2(13) |
| C49 | 369(5)   | 5595(4)  | 3424(2)    | 37.5(9)  |
| C33 | 6222(5)  | 8126(4)  | 4028(2)    | 39.0(9)  |
| N52 | -1537(7) | 2733(4)  | 5393(2)    | 61.3(12) |
| C9  | 888(5)   | 6454(3)  | 1442(2)    | 34.6(8)  |
| C27 | 9794(7)  | 2596(4)  | 1497(3)    | 53.9(12) |

|     |          |          |         |          |
|-----|----------|----------|---------|----------|
| C44 | -1871(6) | 4640(5)  | 4003(3) | 52.2(12) |
| N   | 3941(6)  | 3586(4)  | -421(2) | 58.6(11) |
| N62 | 3522(7)  | 13007(4) | 3264(3) | 72.7(15) |
| C26 | 8899(7)  | 1682(4)  | 1594(2) | 47.7(11) |
| C25 | 7292(7)  | 1844(4)  | 1880(3) | 50.1(11) |
| C29 | 6738(5)  | 4915(3)  | 2151(2) | 35.8(9)  |
| N22 | 1884(6)  | 11336(4) | -219(2) | 63.2(13) |
| C57 | 3957(6)  | 11072(4) | 3055(3) | 51.4(12) |
| C36 | 7320(6)  | 9495(4)  | 4965(2) | 48.1(11) |
| C35 | 7715(7)  | 9663(4)  | 4328(3) | 53.1(12) |
| C28 | 9103(6)  | 3634(4)  | 1681(2) | 46.8(11) |
| C34 | 7168(6)  | 8996(4)  | 3870(2) | 46.0(10) |
| C38 | 5814(6)  | 7978(4)  | 4662(2) | 47.2(11) |
| C47 | 587(6)   | 3593(4)  | 4800(2) | 46.9(11) |
| C15 | 2165(6)  | 9499(4)  | 245(2)  | 44.9(10) |
| C45 | -2338(6) | 3957(5)  | 4483(3) | 54.1(12) |
| C46 | -1109(7) | 3428(4)  | 4892(2) | 48.6(11) |
| C56 | 2855(7)  | 12039(4) | 3146(2) | 49.8(11) |
| C55 | 1095(7)  | 11967(4) | 3124(3) | 51.9(12) |

Table S5. Anisotropic Displacement Parameters ( $\text{\AA}^2 \times 10^3$ ) for Er-CP. The Anisotropic displacement factor exponent takes the form:  $-2\pi^2[h^2a^{*2}U_{11}+2hka^*b^*U_{12}+\dots]$ .

| Atom | $U_{11}$  | $U_{22}$  | $U_{33}$  | $U_{23}$  | $U_{13}$ | $U_{12}$  |
|------|-----------|-----------|-----------|-----------|----------|-----------|
| Er1  | 26.67(13) | 32.12(13) | 33.99(15) | -2.01(9)  | 0.39(9)  | -4.74(9)  |
| Er2  | 26.86(14) | 31.34(13) | 34.52(15) | -0.63(9)  | 1.51(9)  | -4.60(9)  |
| O11  | 31.5(14)  | 47.5(16)  | 28.7(14)  | -3.4(12)  | -1.5(11) | -7.9(12)  |
| O21  | 48.2(17)  | 47.9(17)  | 36.8(16)  | 8.9(13)   | -4.1(13) | -16.3(14) |
| O31  | 36.4(15)  | 38.5(15)  | 50.1(18)  | -6.3(13)  | 7.5(13)  | 1.9(12)   |
| O40  | 47.9(17)  | 64(2)     | 36.4(17)  | -3.8(15)  | -2.4(14) | -21.6(15) |
| O20  | 30.7(14)  | 49.1(17)  | 45.7(18)  | 6.8(14)   | -6.2(12) | -1.2(12)  |
| O51  | 35.0(15)  | 45.1(16)  | 43.3(17)  | 9.2(13)   | 3.9(13)  | -9.2(12)  |
| O10  | 40.3(16)  | 50.4(17)  | 38.9(17)  | -0.1(13)  | 6.6(13)  | 2.2(13)   |
| O    | 31.0(14)  | 46.0(15)  | 33.3(15)  | -7.0(12)  | 3.4(11)  | -4.0(12)  |
| O50  | 47.6(18)  | 53.9(18)  | 43.6(18)  | 14.7(15)  | 6.7(14)  | 5.7(14)   |
| O30  | 49.6(18)  | 31.0(14)  | 69(2)     | -10.2(14) | 3.4(16)  | -12.9(13) |
| O61  | 67(2)     | 30.2(15)  | 86(3)     | -8.5(16)  | 16(2)    | 4.9(15)   |
| O60  | 54.4(19)  | 44.3(17)  | 54(2)     | -5.5(15)  | 0.9(16)  | -19.6(14) |
| C13  | 28.3(19)  | 39(2)     | 35(2)     | 1.9(16)   | -2.8(16) | -2.0(15)  |

|     |          |          |       |          |          |           |
|-----|----------|----------|-------|----------|----------|-----------|
| C7  | 46(2)    | 61(3)    | 36(2) | -9(2)    | 2.0(19)  | -14(2)    |
| C18 | 44(2)    | 41(2)    | 58(3) | 1(2)     | -14(2)   | -9.9(18)  |
| N32 | 90(3)    | 42(2)    | 56(3) | -5(2)    | 12(2)    | 8(2)      |
| C3  | 29.0(19) | 43(2)    | 35(2) | -4.2(17) | 2.7(16)  | -11.1(16) |
| C8  | 40(2)    | 50(2)    | 34(2) | -1.3(18) | -0.7(18) | -8.3(18)  |
| C17 | 53(3)    | 37(2)    | 69(3) | 5(2)     | -5(2)    | -12(2)    |
| C59 | 52(3)    | 34(2)    | 41(2) | -8.4(18) | 9(2)     | -10.1(18) |
| C14 | 33(2)    | 38(2)    | 46(2) | -0.7(18) | -0.3(18) | -6.9(16)  |
| C24 | 40(2)    | 45(2)    | 51(3) | -10(2)   | 8(2)     | -9.7(18)  |
| C16 | 35(2)    | 50(2)    | 46(3) | 10(2)    | 3.9(19)  | 0.9(18)   |
| C4  | 39(2)    | 41(2)    | 39(2) | -5.7(18) | 2.3(18)  | -9.7(17)  |
| C19 | 34(2)    | 40(2)    | 37(2) | -0.9(17) | 1.0(17)  | -6.3(16)  |
| C23 | 36(2)    | 32.6(19) | 39(2) | -1.5(16) | 3.6(17)  | -4.0(15)  |
| C6  | 44(2)    | 50(2)    | 45(3) | -18(2)   | 13(2)    | -21(2)    |
| C5  | 41(2)    | 41(2)    | 55(3) | -8(2)    | 3(2)     | -6.2(18)  |
| C37 | 49(3)    | 64(3)    | 34(2) | -10(2)   | -2.5(19) | -4(2)     |
| C39 | 29.8(19) | 47(2)    | 34(2) | -3.0(17) | -3.1(16) | -1.4(16)  |
| C48 | 34(2)    | 48(2)    | 44(2) | 0.5(19)  | 1.2(18)  | 0.2(17)   |
| C53 | 41(2)    | 32.4(19) | 39(2) | -2.5(17) | -0.6(18) | -7.1(16)  |
| C58 | 46(2)    | 38(2)    | 55(3) | -2(2)    | 4(2)     | -3.9(18)  |
| C43 | 38(2)    | 40(2)    | 41(2) | 3.6(18)  | 2.8(18)  | -6.4(17)  |
| C54 | 44(2)    | 40(2)    | 51(3) | -4(2)    | -2(2)    | -1.2(18)  |
| N42 | 77(3)    | 67(3)    | 57(3) | -16(2)   | -9(2)    | -16(2)    |
| C49 | 34(2)    | 42(2)    | 37(2) | 0.5(17)  | 0.6(17)  | -5.9(16)  |
| C33 | 31(2)    | 46(2)    | 39(2) | -6.2(18) | -1.1(17) | -1.4(17)  |
| N52 | 71(3)    | 63(3)    | 51(3) | 13(2)    | 11(2)    | -15(2)    |
| C9  | 27.9(18) | 39(2)    | 38(2) | -2.3(17) | 5.4(16)  | -9.0(15)  |
| C27 | 48(3)    | 48(3)    | 63(3) | 4(2)     | 20(2)    | 5(2)      |
| C44 | 37(2)    | 63(3)    | 56(3) | 10(2)    | -2(2)    | -6(2)     |
| N   | 66(3)    | 60(3)    | 53(3) | -19(2)   | 15(2)    | -18(2)    |
| N62 | 96(4)    | 50(2)    | 78(4) | -21(2)   | 25(3)    | -32(2)    |
| C26 | 63(3)    | 39(2)    | 39(2) | -3.0(19) | 5(2)     | 6(2)      |
| C25 | 59(3)    | 36(2)    | 57(3) | -5(2)    | 2(2)     | -12(2)    |
| C29 | 38(2)    | 32.2(19) | 37(2) | -5.2(16) | -6.9(17) | -0.1(16)  |
| N22 | 48(2)    | 72(3)    | 68(3) | 29(2)    | -3(2)    | -3(2)     |
| C57 | 46(3)    | 52(3)    | 59(3) | -9(2)    | 7(2)     | -16(2)    |
| C36 | 45(2)    | 55(3)    | 44(3) | -13(2)   | -11(2)   | 1(2)      |
| C35 | 54(3)    | 56(3)    | 53(3) | -9(2)    | -2(2)    | -18(2)    |
| C28 | 40(2)    | 40(2)    | 61(3) | 4(2)     | 13(2)    | -5.3(18)  |
| C34 | 45(2)    | 55(3)    | 40(2) | -8(2)    | 3.3(19)  | -11(2)    |
| C38 | 41(2)    | 60(3)    | 41(3) | -3(2)    | 1.4(19)  | -11(2)    |



|     |       |       |       |       |          |          |
|-----|-------|-------|-------|-------|----------|----------|
| C47 | 46(2) | 45(2) | 48(3) | 7(2)  | 2(2)     | 4.5(19)  |
| C15 | 37(2) | 54(3) | 43(3) | 4(2)  | -4.9(19) | -6.9(19) |
| C45 | 39(2) | 64(3) | 60(3) | 13(3) | 4(2)     | -13(2)   |
| C46 | 56(3) | 45(2) | 45(3) | 3(2)  | 6(2)     | -10(2)   |
| C56 | 64(3) | 43(2) | 44(3) | -8(2) | 11(2)    | -15(2)   |
| C55 | 60(3) | 33(2) | 61(3) | -6(2) | 6(2)     | 1(2)     |

Table S6. Bond Lengths for Er-CP.

| Atom | Atom             | Length/Å | Atom | Atom | Length/Å |
|------|------------------|----------|------|------|----------|
| Er1  | O11              | 2.310(3) | C59  | C53  | 1.473(6) |
| Er1  | O21              | 2.270(3) | C14  | C15  | 1.387(6) |
| Er1  | O31              | 2.243(3) | C24  | C23  | 1.389(6) |
| Er1  | O40              | 2.352(3) | C24  | C25  | 1.371(6) |
| Er1  | O51              | 2.281(3) | C16  | N22  | 1.368(6) |
| Er1  | O                | 2.488(3) | C16  | C15  | 1.398(7) |
| Er1  | O61              | 2.196(3) | C4   | C5   | 1.388(6) |
| Er2  | O11              | 2.489(3) | C23  | C29  | 1.487(5) |
| Er2  | O20 <sup>1</sup> | 2.264(3) | C23  | C28  | 1.395(6) |
| Er2  | O10              | 2.361(3) | C6   | C5   | 1.397(7) |
| Er2  | O <sup>1</sup>   | 2.337(3) | C6   | N    | 1.388(6) |
| Er2  | O50              | 2.230(3) | C37  | C36  | 1.386(8) |
| Er2  | O30 <sup>1</sup> | 2.234(3) | C37  | C38  | 1.376(7) |
| Er2  | O60              | 2.288(3) | C39  | C33  | 1.461(6) |
| O11  | C9               | 1.294(5) | C48  | C43  | 1.390(6) |
| O21  | C19              | 1.266(5) | C48  | C47  | 1.372(7) |
| O31  | C29              | 1.258(5) | C53  | C58  | 1.397(6) |
| O40  | C39              | 1.271(5) | C53  | C54  | 1.390(6) |
| O20  | C19              | 1.261(5) | C58  | C57  | 1.375(7) |
| O51  | C49              | 1.266(5) | C43  | C49  | 1.483(6) |
| O10  | C9               | 1.248(5) | C43  | C44  | 1.400(6) |
| O    | C39              | 1.293(5) | C54  | C55  | 1.378(7) |
| O50  | C49              | 1.266(5) | N42  | C36  | 1.373(7) |
| O30  | C29              | 1.263(5) | C33  | C34  | 1.397(7) |
| O61  | C59              | 1.263(6) | C33  | C38  | 1.394(7) |
| O60  | C59              | 1.264(6) | N52  | C46  | 1.408(6) |
| C13  | C18              | 1.394(6) | C27  | C26  | 1.394(7) |
| C13  | C14              | 1.396(6) | C27  | C28  | 1.380(7) |
| C13  | C19              | 1.480(6) | C44  | C45  | 1.376(7) |

|     |     |          |     |     |          |
|-----|-----|----------|-----|-----|----------|
| C7  | C8  | 1.382(6) | N62 | C56 | 1.371(6) |
| C7  | C6  | 1.387(7) | C26 | C25 | 1.396(7) |
| C18 | C17 | 1.371(7) | C57 | C56 | 1.397(7) |
| N32 | C26 | 1.381(6) | C36 | C35 | 1.402(7) |
| C3  | C8  | 1.390(6) | C35 | C34 | 1.379(7) |
| C3  | C4  | 1.390(6) | C47 | C46 | 1.385(7) |
| C3  | C9  | 1.481(6) | C45 | C46 | 1.397(7) |
| C17 | C16 | 1.389(7) | C56 | C55 | 1.400(7) |

<sup>1</sup>-1+X,+Y,+Z

Table S7. Bond Angles for Er-CP.

| Atom             | Atom | Atom           | Angle/°    | Atom | Atom | Atom | Angle/°  |
|------------------|------|----------------|------------|------|------|------|----------|
| O11              | Er1  | O40            | 146.59(10) | C15  | C14  | C13  | 120.6(4) |
| O11              | Er1  | O              | 153.88(10) | C25  | C24  | C23  | 121.3(4) |
| O21              | Er1  | O11            | 78.30(10)  | C17  | C16  | C15  | 117.7(4) |
| O21              | Er1  | O40            | 130.43(11) | N22  | C16  | C17  | 120.9(5) |
| O21              | Er1  | O51            | 152.91(11) | N22  | C16  | C15  | 121.3(5) |
| O21              | Er1  | O              | 77.44(10)  | C5   | C4   | C3   | 120.9(4) |
| O31              | Er1  | O11            | 100.23(11) | O21  | C19  | C13  | 118.5(4) |
| O31              | Er1  | O21            | 92.70(12)  | O20  | C19  | O21  | 123.2(4) |
| O31              | Er1  | O40            | 95.42(12)  | O20  | C19  | C13  | 118.2(4) |
| O31              | Er1  | O51            | 89.92(11)  | C24  | C23  | C29  | 121.0(4) |
| O31              | Er1  | O              | 90.46(10)  | C24  | C23  | C28  | 118.2(4) |
| O40              | Er1  | O              | 53.73(10)  | C28  | C23  | C29  | 120.8(4) |
| O51              | Er1  | O11            | 74.70(10)  | C7   | C6   | C5   | 118.4(4) |
| O51              | Er1  | O40            | 76.00(11)  | C7   | C6   | N    | 121.4(5) |
| O51              | Er1  | O              | 129.52(10) | N    | C6   | C5   | 120.1(5) |
| O61              | Er1  | O11            | 82.14(13)  | C4   | C5   | C6   | 120.2(4) |
| O61              | Er1  | O21            | 86.31(14)  | C38  | C37  | C36  | 121.0(5) |
| O61              | Er1  | O31            | 177.19(13) | O40  | C39  | Er1  | 56.6(2)  |
| O61              | Er1  | O40            | 83.27(15)  | O40  | C39  | O    | 117.4(4) |
| O61              | Er1  | O51            | 92.16(13)  | O40  | C39  | C33  | 121.0(4) |
| O61              | Er1  | O              | 86.76(13)  | O    | C39  | Er1  | 62.7(2)  |
| O20 <sup>1</sup> | Er2  | O11            | 131.94(10) | O    | C39  | C33  | 121.5(4) |
| O20 <sup>1</sup> | Er2  | O10            | 78.51(11)  | C33  | C39  | Er1  | 162.6(3) |
| O20 <sup>1</sup> | Er2  | O <sup>1</sup> | 74.26(11)  | C47  | C48  | C43  | 121.3(4) |
| O20 <sup>1</sup> | Er2  | O60            | 85.05(12)  | C58  | C53  | C59  | 119.7(4) |
| O10              | Er2  | O11            | 53.44(10)  | C54  | C53  | C59  | 122.1(4) |
| O <sup>1</sup>   | Er2  | O11            | 151.54(10) | C54  | C53  | C58  | 118.3(4) |
| O <sup>1</sup>   | Er2  | O10            | 149.71(10) | C57  | C58  | C53  | 120.9(4) |

|                  |     |                  |            |     |     |     |          |
|------------------|-----|------------------|------------|-----|-----|-----|----------|
| O50              | Er2 | O11              | 76.91(10)  | C48 | C43 | C49 | 119.9(4) |
| O50              | Er2 | O20 <sup>1</sup> | 150.45(11) | C48 | C43 | C44 | 118.0(4) |
| O50              | Er2 | O10              | 129.78(11) | C44 | C43 | C49 | 122.0(4) |
| O50              | Er2 | O <sup>1</sup>   | 76.21(11)  | C55 | C54 | C53 | 121.0(4) |
| O50              | Er2 | O30 <sup>1</sup> | 85.57(14)  | O51 | C49 | O50 | 123.5(4) |
| O50              | Er2 | O60              | 98.93(13)  | O51 | C49 | C43 | 118.1(4) |
| O30 <sup>1</sup> | Er2 | O11              | 81.60(11)  | O50 | C49 | C43 | 118.4(4) |
| O30 <sup>1</sup> | Er2 | O20 <sup>1</sup> | 92.13(12)  | C34 | C33 | C39 | 121.5(4) |
| O30 <sup>1</sup> | Er2 | O10              | 80.77(12)  | C38 | C33 | C39 | 120.9(4) |
| O30 <sup>1</sup> | Er2 | O <sup>1</sup>   | 87.19(11)  | C38 | C33 | C34 | 117.5(4) |
| O30 <sup>1</sup> | Er2 | O60              | 174.99(13) | O11 | C9  | Er2 | 63.3(2)  |
| O60              | Er2 | O11              | 97.20(11)  | O11 | C9  | C3  | 119.9(4) |
| O60              | Er2 | O10              | 94.59(12)  | O10 | C9  | Er2 | 57.5(2)  |
| O60              | Er2 | O <sup>1</sup>   | 96.00(11)  | O10 | C9  | O11 | 118.4(4) |
| Er1              | O11 | Er2              | 116.36(11) | O10 | C9  | C3  | 121.6(4) |
| C9               | O11 | Er1              | 134.7(2)   | C3  | C9  | Er2 | 161.3(3) |
| C9               | O11 | Er2              | 89.0(2)    | C28 | C27 | C26 | 120.5(4) |
| C19              | O21 | Er1              | 138.7(3)   | C45 | C44 | C43 | 120.9(5) |
| C29              | O31 | Er1              | 130.3(3)   | N32 | C26 | C27 | 121.6(5) |
| C39              | O40 | Er1              | 96.6(3)    | N32 | C26 | C25 | 119.9(5) |
| C19              | O20 | Er2 <sup>2</sup> | 133.2(3)   | C27 | C26 | C25 | 118.4(4) |
| C49              | O51 | Er1              | 135.0(3)   | C24 | C25 | C26 | 120.6(4) |
| C9               | O10 | Er2              | 96.0(3)    | O31 | C29 | O30 | 122.9(4) |
| Er2 <sup>2</sup> | O   | Er1              | 117.09(11) | O31 | C29 | C23 | 119.4(4) |
| C39              | O   | Er1              | 89.7(2)    | O30 | C29 | C23 | 117.7(4) |
| C39              | O   | Er2 <sup>2</sup> | 139.3(3)   | C58 | C57 | C56 | 121.1(5) |
| C49              | O50 | Er2              | 142.9(3)   | C37 | C36 | C35 | 118.0(4) |
| C29              | O30 | Er2 <sup>2</sup> | 145.5(3)   | N42 | C36 | C37 | 121.4(5) |
| C59              | O61 | Er1              | 158.1(4)   | N42 | C36 | C35 | 120.6(5) |
| C59              | O60 | Er2              | 121.7(3)   | C34 | C35 | C36 | 120.9(5) |
| C18              | C13 | C14              | 117.6(4)   | C27 | C28 | C23 | 120.9(4) |
| C18              | C13 | C19              | 120.5(4)   | C35 | C34 | C33 | 121.0(5) |
| C14              | C13 | C19              | 121.8(4)   | C37 | C38 | C33 | 121.6(5) |
| C8               | C7  | C6               | 121.5(4)   | C48 | C47 | C46 | 120.7(4) |
| C17              | C18 | C13              | 121.8(4)   | C14 | C15 | C16 | 121.2(4) |
| C8               | C3  | C4               | 118.8(4)   | C44 | C45 | C46 | 120.4(4) |
| C8               | C3  | C9               | 120.7(4)   | C47 | C46 | N52 | 119.1(5) |
| C4               | C3  | C9               | 120.4(4)   | C47 | C46 | C45 | 118.7(4) |
| C7               | C8  | C3               | 120.2(4)   | C45 | C46 | N52 | 122.1(5) |
| C18              | C17 | C16              | 121.0(4)   | N62 | C56 | C57 | 119.5(5) |
| O61              | C59 | O60              | 121.1(4)   | N62 | C56 | C55 | 122.7(5) |

|     |     |     |          |     |     |     |          |
|-----|-----|-----|----------|-----|-----|-----|----------|
| O61 | C59 | C53 | 118.1(4) | C57 | C56 | C55 | 117.8(4) |
| O60 | C59 | C53 | 120.9(4) | C54 | C55 | C56 | 120.9(4) |

<sup>1</sup>-1+X,+Y,+Z; <sup>2</sup>1+X,+Y,+Z

Table S8. Hydrogen Bonds for Er-CP.

| D   | H    | A                | d(D-H)/Å | d(H-A)/Å | d(D-A)/Å | D-H-A/° |
|-----|------|------------------|----------|----------|----------|---------|
| N32 | H32B | O60 <sup>1</sup> | 0.86     | 2.37     | 3.195(6) | 161.3   |
| N52 | H52B | O40 <sup>2</sup> | 0.86     | 2.28     | 3.100(6) | 158.8   |

<sup>1</sup>1+X,-1+Y,+Z; <sup>2</sup>-X,1-Y,1-Z

Table S9. Torsion Angles for Er-CP.

| A                | B   | C   | D   | Angle/°   | A   | B   | C   | D   | Angle/°   |
|------------------|-----|-----|-----|-----------|-----|-----|-----|-----|-----------|
| Er1              | O11 | C9  | Er2 | -127.4(3) | C14 | C13 | C18 | C17 | 3.7(7)    |
| Er1              | O11 | C9  | O10 | -110.1(4) | C14 | C13 | C19 | O21 | -23.2(6)  |
| Er1              | O11 | C9  | C3  | 73.6(5)   | C14 | C13 | C19 | O20 | 156.2(4)  |
| Er1              | O21 | C19 | O20 | 48.6(7)   | C24 | C23 | C29 | O31 | 5.3(6)    |
| Er1              | O21 | C19 | C13 | -132.0(4) | C24 | C23 | C29 | O30 | -172.9(4) |
| Er1              | O31 | C29 | O30 | 10.9(6)   | C24 | C23 | C28 | C27 | 0.5(8)    |
| Er1              | O31 | C29 | C23 | -167.2(3) | C4  | C3  | C8  | C7  | 0.8(6)    |
| Er1              | O40 | C39 | O   | -16.6(4)  | C4  | C3  | C9  | Er2 | -90.5(10) |
| Er1              | O40 | C39 | C33 | 159.6(3)  | C4  | C3  | C9  | O11 | 4.4(6)    |
| Er1              | O51 | C49 | O50 | 8.0(7)    | C4  | C3  | C9  | O10 | -171.7(4) |
| Er1              | O51 | C49 | C43 | -170.9(3) | C19 | C13 | C18 | C17 | -179.8(5) |
| Er1              | O   | C39 | O40 | 15.6(4)   | C19 | C13 | C14 | C15 | -176.5(4) |
| Er1              | O   | C39 | C33 | -160.6(4) | C23 | C24 | C25 | C26 | -1.8(8)   |
| Er1              | O61 | C59 | O60 | 66.4(11)  | C6  | C7  | C8  | C3  | 0.8(7)    |
| Er1              | O61 | C59 | C53 | -114.7(9) | C37 | C36 | C35 | C34 | -0.3(8)   |
| Er1              | C39 | C33 | C34 | -93.8(11) | C39 | C33 | C34 | C35 | 179.0(4)  |
| Er1              | C39 | C33 | C38 | 83.3(11)  | C39 | C33 | C38 | C37 | -179.0(4) |
| Er2              | O11 | C9  | O10 | 17.3(4)   | C48 | C43 | C49 | O51 | 21.0(6)   |
| Er2              | O11 | C9  | C3  | -159.0(3) | C48 | C43 | C49 | O50 | -158.0(4) |
| Er2 <sup>1</sup> | O20 | C19 | O21 | 9.4(7)    | C48 | C43 | C44 | C45 | 0.2(8)    |
| Er2 <sup>1</sup> | O20 | C19 | C13 | -170.0(3) | C48 | C47 | C46 | N52 | -179.7(5) |
| Er2              | O10 | C9  | O11 | -18.3(4)  | C48 | C47 | C46 | C45 | 0.5(8)    |
| Er2              | O10 | C9  | C3  | 157.9(3)  | C53 | C58 | C57 | C56 | 0.3(8)    |
| Er2 <sup>1</sup> | O   | C39 | Er1 | -133.8(4) | C53 | C54 | C55 | C56 | 1.3(8)    |
| Er2 <sup>1</sup> | O   | C39 | O40 | -118.3(4) | C58 | C53 | C54 | C55 | 0.1(7)    |

|                            |           |                 |           |
|----------------------------|-----------|-----------------|-----------|
| Er2 <sup>1</sup> O C39C33  | 65.5(6)   | C58 C57 C56 N62 | 179.9(5)  |
| Er2 O50C49O51              | 34.7(8)   | C58 C57 C56 C55 | 1.1(8)    |
| Er2 O50C49C43              | -146.4(4) | C43 C48 C47 C46 | 0.3(8)    |
| Er2 <sup>1</sup> O30C29O31 | 46.7(7)   | C43 C44 C45 C46 | 0.6(9)    |
| Er2 <sup>1</sup> O30C29C23 | -135.2(4) | C54 C53 C58 C57 | -1.0(7)   |
| Er2 O60C59O61              | -3.0(6)   | N42 C36 C35 C34 | 178.6(5)  |
| Er2 O60C59C53              | 178.2(3)  | C49 C43 C44 C45 | -176.2(5) |
| O40 C39 C33 C34            | -170.7(4) | C9 C3 C8 C7     | -176.5(4) |
| O40 C39 C33 C38            | 6.5(6)    | C9 C3 C4 C5     | 176.3(4)  |
| O C39 C33 C34              | 5.4(6)    | C27 C26 C25 C24 | 1.3(8)    |
| O C39 C33 C38              | -177.4(4) | C44 C43 C49 O51 | -162.7(5) |
| O61 C59 C53 C58            | 20.5(7)   | C44 C43 C49 O50 | 18.4(7)   |
| O61 C59 C53 C54            | -159.2(5) | C44 C45 C46 N52 | 179.3(5)  |
| O60 C59 C53 C58            | -160.6(4) | C44 C45 C46 C47 | -0.9(8)   |
| O60 C59 C53 C54            | 19.7(7)   | N C6 C5 C4      | -175.2(4) |
| C13 C18 C17 C16            | -4.7(8)   | N62 C56 C55 C54 | 179.3(5)  |
| C13 C14 C15 C16            | -2.8(7)   | C26 C27 C28 C23 | -1.0(8)   |
| C7 C6 C5 C4                | 1.9(6)    | C25 C24 C23 C29 | -179.1(4) |
| C18 C13 C14 C15            | 0.1(7)    | C25 C24 C23 C28 | 0.9(7)    |
| C18 C13 C19 O21            | 160.3(4)  | C29 C23 C28 C27 | -179.6(5) |
| C18 C13 C19 O20            | -20.2(6)  | N22 C16 C15 C14 | -175.7(5) |
| C18 C17 C16 N22            | 179.4(5)  | C57 C56 C55 C54 | -1.9(8)   |
| C18 C17 C16 C15            | 1.9(8)    | C36 C37 C38 C33 | 0.8(8)    |
| N32 C26 C25 C24            | -177.7(5) | C36 C35 C34 C33 | -0.8(8)   |
| C3 C4 C5 C6                | -0.4(6)   | C28 C23 C29 O31 | -174.7(4) |
| C8 C7 C6 C5                | -2.1(7)   | C28 C23 C29 O30 | 7.2(6)    |
| C8 C7 C6 N                 | 174.9(4)  | C28 C27 C26 N32 | 179.0(5)  |
| C8 C3 C4 C5                | -1.0(6)   | C28 C27 C26 C25 | 0.0(8)    |
| C8 C3 C9 Er2               | 86.7(10)  | C34 C33 C38 C37 | -1.8(7)   |
| C8 C3 C9 O11               | -178.4(4) | C38 C37 C36 N42 | -178.5(5) |
| C8 C3 C9 O10               | 5.4(6)    | C38 C37 C36 C35 | 0.3(7)    |
| C17 C16 C15 C14            | 1.8(7)    | C38 C33 C34 C35 | 1.8(7)    |
| C59 C53 C58 C57            | 179.3(5)  | C47 C48 C43 C49 | 175.9(4)  |
| C59 C53 C54 C55            | 179.9(5)  | C47 C48 C43 C44 | -0.6(7)   |

<sup>1</sup>1+X,+Y,+Z

Table S10. Hydrogen Atom Coordinates ( $\text{\AA} \times 10^4$ ) and Isotropic Displacement Parameters ( $\text{\AA}^2 \times 10^3$ ) for Er-CP.

| Atom | x       | y       | z       | U(eq) |
|------|---------|---------|---------|-------|
| H7   | 1922.99 | 5411.75 | -558.75 | 57    |

|      |          |          |         |    |
|------|----------|----------|---------|----|
| H18  | 5576     | 10251.83 | 1271.96 | 56 |
| H32A | 10648.45 | 616.07   | 1381.43 | 77 |
| H32B | 9296.28  | 147.76   | 1678.74 | 77 |
| H8   | 650.81   | 6566.49  | 194.84  | 49 |
| H17  | 4241.73  | 11544.59 | 592     | 63 |
| H14  | 2489.03  | 8049.39  | 731.25  | 46 |
| H24  | 5513.97  | 2975.06  | 2227.79 | 54 |
| H4   | 3183.43  | 4700.65  | 1541.92 | 47 |
| H5   | 4447.45  | 3535.71  | 784.9   | 54 |
| H37  | 6075.59  | 8517.28  | 5539.34 | 59 |
| H48  | 2196.27  | 4365.59  | 4263.75 | 51 |
| H58  | 4093.21  | 9452.17  | 2879.56 | 56 |
| H54  | -697.22  | 10955.18 | 2975.71 | 54 |
| H42A | 7885.41  | 10825.21 | 5284.55 | 79 |
| H42B | 7246.29  | 10139.22 | 5748.75 | 79 |
| H52A | -703.39  | 2631.75  | 5657.11 | 74 |
| H52B | -2436.7  | 3035.51  | 5583.39 | 74 |
| H27  | 10865.84 | 2505.71  | 1307.51 | 65 |
| H44  | -2702.83 | 4992.39  | 3736.21 | 63 |
| HA   | 3837.11  | 3887.68  | -791.25 | 70 |
| HB   | 5008.97  | 3417.62  | -337.66 | 70 |
| H62A | 2849.22  | 13555.45 | 3106.99 | 87 |
| H62B | 3569.26  | 13076.17 | 3668.8  | 87 |
| H25  | 6686.16  | 1241.86  | 1956.84 | 60 |
| H22A | 2603.3   | 11784.81 | -331.52 | 76 |
| H22B | 1569.41  | 11002.41 | -544.73 | 76 |
| H57  | 5130.91  | 11095.68 | 3074.45 | 62 |
| H35  | 8354.56  | 10231.89 | 4211.9  | 64 |
| H28  | 9721.97  | 4233.86  | 1618.59 | 56 |
| H34  | 7432.37  | 9128.21  | 3449.43 | 55 |
| H38  | 5159.05  | 7417.49  | 4778.65 | 57 |
| H47  | 1419.67  | 3241.77  | 5067.13 | 56 |
| H15  | 1348.56  | 9291.7   | -30.37  | 54 |
| H45  | -3480    | 3847.06  | 4534.78 | 65 |
| H55  | 333.77   | 12594.1  | 3195.48 | 62 |

Crystal details of Ho-CP

Table S11. Crystal data and structure refinement for Ho-CP.

|                                                              |                                                                                |
|--------------------------------------------------------------|--------------------------------------------------------------------------------|
| Identification code                                          | Ho-CP, Deposition number<br>2180441                                            |
| Empirical formula                                            | C <sub>42</sub> H <sub>36</sub> Ho <sub>2</sub> N <sub>6</sub> O <sub>12</sub> |
| Formula weight                                               | 1146.63                                                                        |
| Temperature/K                                                | 297(2)                                                                         |
| Crystal system                                               | triclinic                                                                      |
| Space group                                                  | <i>P</i> -1                                                                    |
| <i>a</i> /Å                                                  | 7.88458(12)                                                                    |
| <i>b</i> /Å                                                  | 12.1481(2)                                                                     |
| <i>c</i> /Å                                                  | 21.2468(3)                                                                     |
| $\alpha$ /°                                                  | 88.9472(13)                                                                    |
| $\beta$ /°                                                   | 89.6458(12)                                                                    |
| $\gamma$ /°                                                  | 83.3501(13)                                                                    |
| Volume/Å <sup>3</sup>                                        | 2021.02(5)                                                                     |
| <i>Z</i>                                                     | 2                                                                              |
| $\rho_{\text{calc}}$ /cm <sup>3</sup>                        | 1.884                                                                          |
| $\mu$ /mm <sup>-1</sup>                                      | 7.708                                                                          |
| <i>F</i> (000)                                               | 1120.0                                                                         |
| Crystal size/mm <sup>3</sup>                                 | 0.107 × 0.077 × 0.043                                                          |
| Radiation                                                    | Cu K $\alpha$ ( $\lambda$ = 1.54184)                                           |
| 2 $\Theta$ range for data collection/°                       | 7.328 to 155.224                                                               |
| Index ranges                                                 | -9 ≤ <i>h</i> ≤ 8, -15 ≤ <i>k</i> ≤ 14, -26 ≤ <i>l</i> ≤ 24                    |
| Reflections collected                                        | 22328                                                                          |
| Independent reflections                                      | 7819 [ <i>R</i> <sub>int</sub> = 0.0338, <i>R</i> <sub>sigma</sub> = 0.0358]   |
| Data/restraints/parameters                                   | 7819/0/570                                                                     |
| Goodness-of-fit on <i>F</i> <sup>2</sup>                     | 1.060                                                                          |
| Final <i>R</i> indexes [ <i>I</i> ≥ 2 $\sigma$ ( <i>I</i> )] | <i>R</i> <sub>1</sub> = 0.0282, <i>wR</i> <sub>2</sub> = 0.0702                |
| Final <i>R</i> indexes [all data]                            | <i>R</i> <sub>1</sub> = 0.0327, <i>wR</i> <sub>2</sub> = 0.0721                |
| Largest diff. peak/hole / e Å <sup>-3</sup>                  | 0.43/-0.54                                                                     |

Table S12. Fractional Atomic Coordinates (×10<sup>4</sup>) and Equivalent Isotropic Displacement Parameters (Å<sup>2</sup>×10<sup>3</sup>) for Ho-CP. *U*<sub>eq</sub> is defined as 1/3 of the trace of the orthogonalised *U*<sub>ij</sub> tensor.

| Atom | <i>x</i>  | <i>y</i>   | <i>z</i>   | <i>U</i> (eq) |
|------|-----------|------------|------------|---------------|
| Ho1  | 6540.8(2) | 2705.4(2)  | 2675.1(2)  | 27.87(7)      |
| Ho2  | 1457.3(2) | 3448.2(2)  | 2344.4(2)  | 28.05(7)      |
| O11  | 5608(3)   | 1030(2)    | 2439.7(11) | 50.7(6)       |
| O21  | 5769(3)   | 3687(2)    | 1799.4(10) | 47.9(5)       |
| O31  | 3743(2)   | 3750.8(17) | 2978.6(8)  | 32.6(4)       |

|     |          |            |            |          |
|-----|----------|------------|------------|----------|
| O41 | 806(3)   | 2592.0(19) | 3259.7(10) | 40.9(5)  |
| O51 | 8994(2)  | 2465.5(18) | 2033.3(9)  | 34.3(4)  |
| N32 | 1054(4)  | 6412(3)    | 5423.8(15) | 58.1(8)  |
| O50 | 457(3)   | 3246(2)    | 1313.5(10) | 48.2(6)  |
| O61 | -326(3)  | 4978.8(18) | 2556.2(10) | 41.2(5)  |
| O30 | 5289(3)  | 2794.4(19) | 3691.4(9)  | 40.2(5)  |
| O10 | 3133(4)  | 1916(2)    | 2142.5(15) | 66.6(7)  |
| O20 | 3087(2)  | 4493.2(18) | 1735.6(10) | 39.0(5)  |
| C49 | -591(3)  | 2565(3)    | 1449.6(13) | 34.3(6)  |
| C27 | 1330(4)  | 5859(3)    | 4339.2(16) | 43.1(7)  |
| O40 | 8547(2)  | 1646.6(19) | 3253.6(10) | 39.8(5)  |
| N62 | -4579(5) | 9359(3)    | 3596.0(16) | 63.7(9)  |
| C53 | -2484(3) | 6196(2)    | 3039.0(14) | 34.6(6)  |
| C25 | 2850(4)  | 4736(3)    | 5137.7(14) | 46.0(8)  |
| C46 | -2319(4) | 504(3)     | 33.3(16)   | 45.9(7)  |
| C36 | 2350(4)  | -561(3)    | 4807.8(15) | 41.6(7)  |
| C14 | 6867(4)  | 5359(3)    | 987.8(17)  | 47.4(8)  |
| C58 | -1595(4) | 7119(3)    | 2953.5(15) | 40.5(7)  |
| C57 | -2307(5) | 8159(3)    | 3120.2(16) | 47.8(8)  |
| N42 | 3115(4)  | -1337(3)   | 5224.2(16) | 63.0(9)  |
| C47 | -2708(5) | 330(3)     | 667.5(17)  | 51.9(8)  |
| C13 | 5165(4)  | 5191(3)    | 1085.9(13) | 35.4(6)  |
| C18 | 3953(4)  | 5734(3)    | 681.0(15)  | 40.9(7)  |
| C28 | 2087(4)  | 5164(3)    | 3888.8(14) | 37.0(6)  |
| C48 | -2157(4) | 1001(3)    | 1125.7(15) | 43.2(7)  |
| C17 | 4412(4)  | 6408(3)    | 198.8(16)  | 45.4(7)  |
| C16 | 6105(5)  | 6575(3)    | 101.5(16)  | 46.8(7)  |
| C33 | 858(3)   | 978(2)     | 3905.5(13) | 31.8(6)  |
| C44 | -797(4)  | 2019(3)    | 336.3(14)  | 44.1(7)  |
| C24 | 3599(4)  | 4040(3)    | 4685.3(13) | 38.5(6)  |
| C55 | -4792(5) | 7398(3)    | 3504.4(18) | 52.1(8)  |
| C38 | 337(4)   | -67(3)     | 3976.3(16) | 45.6(8)  |
| C15 | 7329(4)  | 6048(3)    | 510.3(18)  | 54.5(9)  |
| C39 | 23(3)    | 1787(3)    | 3441.0(13) | 33.4(6)  |
| C37 | 1096(4)  | -833(3)    | 4398.5(18) | 49.4(8)  |
| N12 | 1463(5)  | -2995(3)   | 1725(2)    | 69.9(10) |
| C7  | 1053(4)  | -1064(3)   | 1949.0(17) | 49.7(8)  |
| C3  | 3454(4)  | -32(2)     | 2100.8(13) | 35.8(6)  |
| C4  | 4531(4)  | -996(3)    | 2002.1(15) | 42.0(7)  |
| C5  | 3889(5)  | -1973(3)   | 1871.4(17) | 49.0(8)  |
| N52 | -2913(5) | -132(3)    | -421.8(16) | 63.9(9)  |



|     |          |            |            |         |
|-----|----------|------------|------------|---------|
| C23 | 3242(3)  | 4250(2)    | 4048.5(13) | 32.3(6) |
| O60 | 7495(3)  | 4270.2(18) | 3000.9(12) | 47.3(5) |
| N22 | 6521(4)  | 7271(3)    | -392.1(15) | 59.5(8) |
| C8  | 1695(4)  | -80(3)     | 2070.5(16) | 43.5(7) |
| C43 | -1212(3) | 1868(3)    | 969.3(13)  | 36.6(6) |
| C29 | 4114(3)  | 3552(2)    | 3562.5(12) | 31.4(6) |
| C35 | 2841(4)  | 507(3)     | 4757.1(14) | 41.4(7) |
| C54 | -4090(4) | 6366(3)    | 3315.6(16) | 45.0(7) |
| C6  | 2139(5)  | -2028(3)   | 1855.5(16) | 47.0(8) |
| C26 | 1716(4)  | 5664(3)    | 4976.4(15) | 41.3(7) |
| C56 | -3917(5) | 8317(3)    | 3408.0(15) | 45.3(7) |
| C34 | 2143(3)  | 1252(3)    | 4302.9(14) | 35.1(6) |
| C19 | 4639(4)  | 4415(3)    | 1576.8(13) | 34.4(6) |
| C59 | -1733(3) | 5093(2)    | 2849.6(13) | 34.2(6) |
| C9  | 4103(4)  | 1024(3)    | 2239.2(14) | 41.3(7) |
| C45 | -1350(4) | 1356(3)    | -120.3(15) | 48.5(8) |

Table S13. Anisotropic Displacement Parameters ( $\text{\AA}^2 \times 10^3$ ) for Ho-CP. The Anisotropic displacement factor exponent takes the form:  $-2\pi^2[h^2a^{*2}U_{11}+2hka^*b^*U_{12}+\dots]$ .

| Atom | $U_{11}$  | $U_{22}$  | $U_{33}$  | $U_{23}$  | $U_{13}$ | $U_{12}$  |
|------|-----------|-----------|-----------|-----------|----------|-----------|
| Ho1  | 24.91(10) | 28.95(11) | 29.57(11) | 1.68(8)   | 1.26(7)  | -2.77(8)  |
| Ho2  | 25.09(10) | 30.03(12) | 29.12(11) | -0.02(8)  | 0.33(7)  | -3.59(8)  |
| O11  | 60.0(14)  | 47.5(14)  | 49.3(13)  | -6.6(11)  | 2.5(11)  | -25.0(12) |
| O21  | 44.3(11)  | 53.8(14)  | 41.0(11)  | 19.1(10)  | 5.6(9)   | 10.7(10)  |
| O31  | 27.6(8)   | 44.1(12)  | 26.9(9)   | -2.8(8)   | 1.0(7)   | -7.5(8)   |
| O41  | 44.0(11)  | 44.0(12)  | 36.0(10)  | 11.3(9)   | -4.3(9)  | -12.2(10) |
| O51  | 30.1(9)   | 43.3(12)  | 29.1(9)   | -4.2(8)   | 1.4(7)   | -2.1(8)   |
| N32  | 65.3(18)  | 60(2)     | 52.3(17)  | -20.4(15) | 18.1(15) | -16.8(16) |
| O50  | 52.1(12)  | 65.6(16)  | 31.6(10)  | -0.7(10)  | -1.1(9)  | -26.6(12) |
| O61  | 36.6(10)  | 37.5(12)  | 48.0(12)  | -5.6(9)   | 5.5(9)   | 2.3(9)    |
| O30  | 40.0(10)  | 46.5(13)  | 32.0(10)  | 2.6(9)    | 5.2(8)   | 3.4(9)    |
| O10  | 77.5(17)  | 28.9(13)  | 90(2)     | -7.1(13)  | 24.8(15) | 7.0(12)   |
| O20  | 32.1(9)   | 43.0(12)  | 42.2(11)  | 12.0(9)   | 1.7(8)   | -7.9(9)   |
| C49  | 30.0(12)  | 42.7(17)  | 30.2(13)  | -1.3(12)  | -0.7(11) | -3.6(12)  |
| C27  | 41.1(15)  | 40.4(18)  | 48.2(17)  | -7.5(14)  | 6.1(13)  | -5.4(13)  |
| O40  | 30.7(9)   | 46.9(13)  | 41.3(11)  | 11.9(9)   | -7.1(8)  | -3.3(9)   |
| N62  | 91(2)     | 39.2(17)  | 55.9(18)  | -2.9(14)  | 11.4(17) | 14.1(16)  |
| C53  | 34.5(13)  | 31.4(15)  | 38.2(14)  | -2.1(12)  | 0.5(11)  | -5.5(11)  |
| C25  | 49.0(17)  | 61(2)     | 30.4(14)  | -8.3(14)  | 4.3(13)  | -15.2(16) |

|     |          |          |          |           |           |           |
|-----|----------|----------|----------|-----------|-----------|-----------|
| C46 | 43.6(16) | 52(2)    | 41.9(16) | -10.6(14) | -9.1(13)  | -0.4(14)  |
| C36 | 33.0(14) | 45.9(18) | 43.1(16) | 13.5(14)  | 5.0(12)   | 5.0(13)   |
| C14 | 35.0(15) | 54(2)    | 52.8(19) | 13.5(16)  | -2.0(14)  | -6.4(14)  |
| C58 | 38.3(14) | 37.7(17) | 46.3(17) | -4.4(13)  | 5.1(13)   | -7.9(13)  |
| C57 | 58.4(19) | 35.4(17) | 51.0(18) | -5.6(14)  | 5.0(15)   | -11.1(15) |
| N42 | 51.5(16) | 70(2)    | 64(2)    | 34.2(18)  | -2.0(15)  | -0.2(16)  |
| C47 | 56.5(19) | 55(2)    | 47.0(18) | -8.7(16)  | -2.2(15)  | -17.5(17) |
| C13 | 36.7(14) | 35.5(16) | 33.5(14) | 2.2(12)   | 4.7(11)   | -2.4(12)  |
| C18 | 35.7(14) | 42.4(17) | 42.5(16) | 5.8(13)   | 4.3(12)   | 2.6(13)   |
| C28 | 36.5(14) | 40.7(17) | 34.6(14) | -3.4(12)  | 1.0(11)   | -8.1(12)  |
| C48 | 43.3(16) | 53(2)    | 34.1(15) | -3.9(13)  | 1.4(13)   | -8.8(14)  |
| C17 | 48.4(17) | 42.2(18) | 43.3(17) | 7.6(14)   | 2.0(14)   | 2.7(14)   |
| C16 | 57.2(18) | 41.7(18) | 42.1(16) | 6.3(14)   | 6.7(14)   | -10.0(15) |
| C33 | 28.3(12) | 33.8(15) | 32.6(13) | 2.5(11)   | 0.1(10)   | -1.9(11)  |
| C44 | 42.3(15) | 55(2)    | 35.9(15) | -0.5(14)  | -1.0(13)  | -9.8(15)  |
| C24 | 36.0(14) | 48.0(18) | 32.2(14) | -3.8(12)  | 0.3(12)   | -6.9(13)  |
| C55 | 52.0(18) | 43.4(19) | 57(2)    | 3.5(16)   | 21.9(16)  | 7.1(15)   |
| C38 | 45.6(16) | 39.0(17) | 53.4(18) | 3.5(14)   | -15.4(14) | -10.1(14) |
| C15 | 41.4(16) | 66(2)    | 58(2)    | 14.6(18)  | 3.9(15)   | -16.6(17) |
| C39 | 32.3(13) | 37.4(16) | 30.1(13) | 0.0(11)   | 2.7(11)   | -3.1(12)  |
| C37 | 52.2(18) | 32.7(17) | 64(2)    | 8.0(15)   | -5.0(16)  | -8.4(14)  |
| N12 | 80(2)    | 46(2)    | 89(3)    | -15.1(18) | 24(2)     | -28.2(19) |
| C7  | 44.4(16) | 49(2)    | 57(2)    | -3.3(16)  | 5.8(15)   | -11.9(15) |
| C3  | 43.1(15) | 29.5(15) | 34.5(14) | -2.8(11)  | 3.0(12)   | -2.4(12)  |
| C4  | 42.3(15) | 37.8(17) | 44.9(17) | -2.6(13)  | -2.7(13)  | 0.4(13)   |
| C5  | 54.1(18) | 31.7(16) | 60(2)    | -5.7(15)  | 8.5(16)   | 1.6(14)   |
| N52 | 79(2)    | 65(2)    | 49.4(17) | -14.7(16) | -8.7(17)  | -14.0(18) |
| C23 | 28.3(12) | 39.2(16) | 31.0(13) | -3.6(11)  | 2.9(10)   | -10.7(11) |
| O60 | 48.0(12) | 29.2(11) | 66.1(15) | -6.9(10)  | 4.1(11)   | -9.9(10)  |
| N22 | 69.9(19) | 56(2)    | 52.7(17) | 16.8(15)  | 8.1(15)   | -12.2(16) |
| C8  | 42.9(16) | 34.8(16) | 51.9(18) | -2.6(14)  | 4.0(14)   | -0.9(13)  |
| C43 | 30.2(13) | 47.6(18) | 31.7(14) | -5.2(12)  | -2.5(11)  | -2.3(12)  |
| C29 | 25.3(11) | 40.3(16) | 30.3(13) | 0.7(11)   | 2.3(10)   | -11.1(11) |
| C35 | 29.8(13) | 54(2)    | 39.9(16) | 4.8(14)   | -5.5(12)  | -4.3(13)  |
| C54 | 40.7(15) | 36.9(17) | 57.4(19) | 5.0(14)   | 11.1(14)  | -5.7(13)  |
| C6  | 62(2)    | 37.8(18) | 43.2(17) | -8.8(13)  | 10.7(15)  | -13.3(16) |
| C26 | 41.3(15) | 44.1(18) | 41.8(16) | -13.6(13) | 13.6(13)  | -17.3(14) |
| C56 | 62.7(19) | 33.8(16) | 36.3(15) | -2.1(12)  | 5.2(14)   | 7.1(14)   |
| C34 | 32.3(13) | 34.7(15) | 38.8(15) | 2.3(12)   | -0.1(11)  | -6.4(11)  |
| C19 | 35.8(13) | 34.8(15) | 32.8(13) | 2.1(11)   | -0.5(11)  | -4.6(12)  |
| C59 | 31.7(13) | 33.9(15) | 37.3(14) | -4.9(12)  | -2.9(11)  | -4.1(11)  |

|     |          |          |          |          |          |           |
|-----|----------|----------|----------|----------|----------|-----------|
| C9  | 53.9(18) | 35.0(16) | 36.6(15) | -5.7(12) | 12.9(13) | -11.6(14) |
| C45 | 50.3(17) | 62(2)    | 32.5(15) | -7.0(15) | -0.1(13) | -2.7(16)  |

Table S14. Bond Lengths for Ho-CP.

| Atom | Atom             | Length/Å   | Atom | Atom | Length/Å |
|------|------------------|------------|------|------|----------|
| Ho1  | O11              | 2.307(2)   | C46  | C45  | 1.389(5) |
| Ho1  | O21              | 2.240(2)   | C36  | N42  | 1.370(4) |
| Ho1  | O31              | 2.502(2)   | C36  | C37  | 1.392(5) |
| Ho1  | O51              | 2.3534(19) | C36  | C35  | 1.399(5) |
| Ho1  | O30              | 2.368(2)   | C14  | C13  | 1.394(4) |
| Ho1  | O40              | 2.2722(19) | C14  | C15  | 1.377(5) |
| Ho1  | O60              | 2.246(2)   | C58  | C57  | 1.373(5) |
| Ho2  | O31              | 2.3238(16) | C57  | C56  | 1.400(5) |
| Ho2  | O41              | 2.273(2)   | C47  | C48  | 1.385(5) |
| Ho2  | O51 <sup>1</sup> | 2.4928(18) | C13  | C18  | 1.390(4) |
| Ho2  | O50              | 2.359(2)   | C13  | C19  | 1.483(4) |
| Ho2  | O61              | 2.248(2)   | C18  | C17  | 1.372(4) |
| Ho2  | O10              | 2.202(3)   | C28  | C23  | 1.391(4) |
| Ho2  | O20              | 2.2873(19) | C48  | C43  | 1.393(4) |
| O11  | C9               | 1.265(4)   | C17  | C16  | 1.387(5) |
| O21  | C19              | 1.267(4)   | C16  | C15  | 1.393(5) |
| O31  | C29              | 1.289(3)   | C16  | N22  | 1.397(4) |
| O41  | C39              | 1.268(3)   | C33  | C38  | 1.384(4) |
| O51  | C49 <sup>2</sup> | 1.288(3)   | C33  | C39  | 1.482(4) |
| N32  | C26              | 1.385(4)   | C33  | C34  | 1.396(4) |
| O50  | C49              | 1.264(4)   | C44  | C43  | 1.396(4) |
| O61  | C59              | 1.264(4)   | C44  | C45  | 1.377(5) |
| O30  | C29              | 1.255(4)   | C24  | C23  | 1.397(4) |
| O10  | C9               | 1.266(4)   | C55  | C54  | 1.376(5) |
| O20  | C19              | 1.261(4)   | C55  | C56  | 1.390(5) |
| C49  | C43              | 1.460(4)   | C38  | C37  | 1.370(5) |
| C27  | C28              | 1.376(5)   | N12  | C6   | 1.378(4) |
| C27  | C26              | 1.399(5)   | C7   | C8   | 1.380(5) |
| O40  | C39 <sup>2</sup> | 1.263(3)   | C7   | C6   | 1.385(5) |
| N62  | C56              | 1.377(5)   | C3   | C4   | 1.383(4) |
| C53  | C58              | 1.398(4)   | C3   | C8   | 1.397(4) |
| C53  | C54              | 1.388(4)   | C3   | C9   | 1.471(4) |
| C53  | C59              | 1.463(4)   | C4   | C5   | 1.377(5) |

|     |     |          |     |                  |          |
|-----|-----|----------|-----|------------------|----------|
| C25 | C24 | 1.377(5) | C5  | C6               | 1.390(5) |
| C25 | C26 | 1.394(5) | C23 | C29              | 1.465(4) |
| C46 | C47 | 1.398(5) | O60 | C59 <sup>2</sup> | 1.265(4) |
| C46 | N52 | 1.367(4) | C35 | C34              | 1.383(4) |

<sup>1</sup>-1+X,+Y,+Z; <sup>2</sup>1+X,+Y,+Z

Table S15. Bond Angles for Ho-CP.

| Atom | Atom | Atom             | Angle/°   | Atom             | Atom | Atom | Angle/°  |
|------|------|------------------|-----------|------------------|------|------|----------|
| O11  | Ho1  | O31              | 99.03(8)  | N42              | C36  | C37  | 120.5(3) |
| O11  | Ho1  | O51              | 95.54(8)  | N42              | C36  | C35  | 121.8(3) |
| O11  | Ho1  | O30              | 94.61(8)  | C37              | C36  | C35  | 117.6(3) |
| O21  | Ho1  | O11              | 100.47(9) | C15              | C14  | C13  | 121.1(3) |
| O21  | Ho1  | O31              | 77.05(7)  | C57              | C58  | C53  | 121.2(3) |
| O21  | Ho1  | O51              | 76.13(7)  | C58              | C57  | C56  | 120.8(3) |
| O21  | Ho1  | O30              | 129.66(8) | C48              | C47  | C46  | 120.6(3) |
| O21  | Ho1  | O40              | 150.40(8) | C14              | C13  | C19  | 122.4(3) |
| O21  | Ho1  | O60              | 85.08(9)  | C18              | C13  | C14  | 117.7(3) |
| O51  | Ho1  | O31              | 151.35(7) | C18              | C13  | C19  | 119.9(3) |
| O51  | Ho1  | O30              | 149.64(7) | C17              | C18  | C13  | 121.3(3) |
| O30  | Ho1  | O31              | 53.15(6)  | C27              | C28  | C23  | 121.6(3) |
| O40  | Ho1  | O11              | 84.18(9)  | C47              | C48  | C43  | 121.2(3) |
| O40  | Ho1  | O31              | 131.51(7) | C18              | C17  | C16  | 121.0(3) |
| O40  | Ho1  | O51              | 74.32(7)  | C17              | C16  | C15  | 118.2(3) |
| O40  | Ho1  | O30              | 78.37(8)  | C17              | C16  | N22  | 119.3(3) |
| O60  | Ho1  | O11              | 174.37(9) | C15              | C16  | N22  | 122.5(3) |
| O60  | Ho1  | O31              | 81.22(7)  | C38              | C33  | C39  | 120.7(2) |
| O60  | Ho1  | O51              | 86.65(8)  | C38              | C33  | C34  | 117.6(3) |
| O60  | Ho1  | O30              | 81.00(8)  | C34              | C33  | C39  | 121.6(3) |
| O60  | Ho1  | O40              | 91.44(8)  | C45              | C44  | C43  | 121.1(3) |
| O31  | Ho2  | O51 <sup>1</sup> | 154.26(7) | C25              | C24  | C23  | 120.6(3) |
| O31  | Ho2  | O50              | 147.03(7) | C54              | C55  | C56  | 120.5(3) |
| O41  | Ho2  | O31              | 78.22(7)  | C37              | C38  | C33  | 121.9(3) |
| O41  | Ho2  | O51 <sup>1</sup> | 77.69(7)  | C14              | C15  | C16  | 120.6(3) |
| O41  | Ho2  | O50              | 130.18(7) | O41              | C39  | C33  | 118.8(2) |
| O41  | Ho2  | O20              | 153.12(7) | O40 <sup>1</sup> | C39  | O41  | 123.3(3) |
| O50  | Ho2  | O51 <sup>1</sup> | 53.27(7)  | O40 <sup>1</sup> | C39  | C33  | 117.9(2) |
| O61  | Ho2  | O31              | 99.63(7)  | C38              | C37  | C36  | 120.9(3) |
| O61  | Ho2  | O41              | 92.67(8)  | C8               | C7   | C6   | 120.7(3) |
| O61  | Ho2  | O51 <sup>1</sup> | 90.43(7)  | C4               | C3   | C8   | 118.1(3) |
| O61  | Ho2  | O50              | 95.66(9)  | C4               | C3   | C9   | 122.2(3) |

|                  |     |                  |            |                  |     |                  |            |
|------------------|-----|------------------|------------|------------------|-----|------------------|------------|
| O61              | Ho2 | O20              | 89.74(8)   | C8               | C3  | C9               | 119.7(3)   |
| O10              | Ho2 | O31              | 81.63(10)  | C5               | C4  | C3               | 121.0(3)   |
| O10              | Ho2 | O41              | 86.18(10)  | C4               | C5  | C6               | 120.9(3)   |
| O10              | Ho2 | O51 <sup>1</sup> | 87.84(9)   | C28              | C23 | C24              | 118.1(3)   |
| O10              | Ho2 | O50              | 83.95(11)  | C28              | C23 | C29              | 121.1(3)   |
| O10              | Ho2 | O61              | 178.10(9)  | C24              | C23 | C29              | 120.8(3)   |
| O10              | Ho2 | O20              | 91.96(10)  | C59 <sup>2</sup> | O60 | Ho1              | 146.2(2)   |
| O20              | Ho2 | O31              | 74.98(7)   | C7               | C8  | C3               | 120.8(3)   |
| O20              | Ho2 | O51 <sup>1</sup> | 129.08(7)  | C48              | C43 | C49              | 121.7(3)   |
| O20              | Ho2 | O50              | 76.06(7)   | C48              | C43 | C44              | 117.7(3)   |
| C9               | O11 | Ho1              | 118.8(2)   | C44              | C43 | C49              | 120.5(3)   |
| C19              | O21 | Ho1              | 142.8(2)   | O31              | C29 | Ho1              | 63.27(14)  |
| Ho2              | O31 | Ho1              | 114.86(8)  | O31              | C29 | C23              | 119.7(3)   |
| C29              | O31 | Ho1              | 89.34(16)  | O30              | C29 | Ho1              | 57.16(14)  |
| C29              | O31 | Ho2              | 134.27(16) | O30              | C29 | O31              | 118.1(3)   |
| C39              | O41 | Ho2              | 138.68(18) | O30              | C29 | C23              | 122.1(2)   |
| Ho1              | O51 | Ho2 <sup>2</sup> | 117.05(8)  | C23              | C29 | Ho1              | 161.57(17) |
| C49 <sup>2</sup> | O51 | Ho1              | 139.08(17) | C34              | C35 | C36              | 121.0(3)   |
| C49 <sup>2</sup> | O51 | Ho2 <sup>2</sup> | 90.13(15)  | C55              | C54 | C53              | 121.9(3)   |
| C49              | O50 | Ho2              | 96.98(17)  | N12              | C6  | C7               | 119.5(3)   |
| C59              | O61 | Ho2              | 130.6(2)   | N12              | C6  | C5               | 122.1(4)   |
| C29              | O30 | Ho1              | 96.39(16)  | C7               | C6  | C5               | 118.3(3)   |
| C9               | O10 | Ho2              | 159.4(3)   | N32              | C26 | C27              | 120.2(3)   |
| C19              | O20 | Ho2              | 134.88(19) | N32              | C26 | C25              | 121.6(3)   |
| O51 <sup>1</sup> | C49 | Ho2              | 62.57(13)  | C25              | C26 | C27              | 118.1(3)   |
| O51 <sup>1</sup> | C49 | C43              | 121.5(3)   | N62              | C56 | C57              | 120.0(3)   |
| O50              | C49 | Ho2              | 56.49(14)  | N62              | C56 | C55              | 121.9(3)   |
| O50              | C49 | O51 <sup>1</sup> | 117.3(2)   | C55              | C56 | C57              | 118.2(3)   |
| O50              | C49 | C43              | 121.1(3)   | C35              | C34 | C33              | 120.8(3)   |
| C43              | C49 | Ho2              | 163.1(2)   | O21              | C19 | C13              | 118.0(3)   |
| C28              | C27 | C26              | 120.4(3)   | O20              | C19 | O21              | 123.7(3)   |
| C39 <sup>2</sup> | O40 | Ho1              | 133.50(19) | O20              | C19 | C13              | 118.3(3)   |
| C58              | C53 | C59              | 121.0(3)   | O61              | C59 | C53              | 120.0(3)   |
| C54              | C53 | C58              | 117.4(3)   | O61              | C59 | O60 <sup>1</sup> | 121.7(3)   |
| C54              | C53 | C59              | 121.6(3)   | O60 <sup>1</sup> | C59 | C53              | 118.3(3)   |
| C24              | C25 | C26              | 121.3(3)   | O11              | C9  | O10              | 121.4(3)   |
| N52              | C46 | C47              | 120.6(3)   | O11              | C9  | C3               | 120.1(3)   |
| N52              | C46 | C45              | 121.2(3)   | O10              | C9  | C3               | 118.5(3)   |
| C45              | C46 | C47              | 118.1(3)   | C44              | C45 | C46              | 121.2(3)   |

<sup>1</sup>-1+X,+Y,+Z; <sup>2</sup>1+X,+Y,+Z

Table S16. Hydrogen Bonds for Ho-CP.

| D   | H    | A                | d(D-H)/Å | d(H-A)/Å | d(D-A)/Å | D-H-A/° |
|-----|------|------------------|----------|----------|----------|---------|
| N62 | H62A | O11 <sup>1</sup> | 0.87     | 2.35     | 3.172(4) | 157.5   |
| N12 | H12A | O20 <sup>2</sup> | 0.82     | 2.47     | 3.169(5) | 144.2   |
| N22 | H22A | O50 <sup>3</sup> | 0.87     | 2.27     | 3.090(4) | 157.1   |

<sup>1</sup>-1+X,1+Y,+Z; <sup>2</sup>+X,-1+Y,+Z; <sup>3</sup>1-X,1-Y,-Z

Table S17. Torsion Angles for Ho-CP.

| A                | B   | C   | D                | Angle/°    | A   | B   | C   | D                | Angle/°   |
|------------------|-----|-----|------------------|------------|-----|-----|-----|------------------|-----------|
| Ho1              | O11 | C9  | O10              | 2.9(4)     | C28 | C23 | C29 | Ho1              | 90.5(6)   |
| Ho1              | O11 | C9  | C3               | -178.4(2)  | C28 | C23 | C29 | O31              | -3.6(4)   |
| Ho1              | O21 | C19 | O20              | -34.0(5)   | C28 | C23 | C29 | O30              | 172.4(2)  |
| Ho1              | O21 | C19 | C13              | 148.2(3)   | C17 | C16 | C15 | C14              | 1.6(6)    |
| Ho1              | O31 | C29 | O30              | -16.9(2)   | C33 | C38 | C37 | C36              | 4.7(6)    |
| Ho1              | O31 | C29 | C23              | 159.3(2)   | C24 | C25 | C26 | N32              | -175.2(3) |
| Ho1              | O30 | C29 | O31              | 18.0(2)    | C24 | C25 | C26 | C27              | 1.3(4)    |
| Ho1              | O30 | C29 | C23              | -158.1(2)  | C24 | C23 | C29 | Ho1              | -87.0(7)  |
| Ho2              | O31 | C29 | Ho1              | 125.2(2)   | C24 | C23 | C29 | O31              | 178.9(2)  |
| Ho2              | O31 | C29 | O30              | 108.3(3)   | C24 | C23 | C29 | O30              | -5.1(4)   |
| Ho2              | O31 | C29 | C23              | -75.5(3)   | C38 | C33 | C39 | O41              | -160.3(3) |
| Ho2              | O41 | C39 | O40 <sup>1</sup> | -48.7(5)   | C38 | C33 | C39 | O40 <sup>1</sup> | 20.8(4)   |
| Ho2              | O41 | C39 | C33              | 132.5(3)   | C38 | C33 | C34 | C35              | -1.1(5)   |
| Ho2              | O50 | C49 | O51 <sup>1</sup> | 15.7(3)    | C15 | C14 | C13 | C18              | 0.7(6)    |
| Ho2              | O50 | C49 | C43              | -160.2(2)  | C15 | C14 | C13 | C19              | 177.1(3)  |
| Ho2              | O61 | C59 | C53              | 167.24(19) | C39 | C33 | C38 | C37              | 179.5(3)  |
| Ho2              | O61 | C59 | O60 <sup>1</sup> | -11.0(4)   | C39 | C33 | C34 | C35              | 176.4(3)  |
| Ho2              | O10 | C9  | O11              | -72.3(8)   | C37 | C36 | C35 | C34              | -2.0(5)   |
| Ho2              | O10 | C9  | C3               | 108.9(7)   | C3  | C4  | C5  | C6               | -2.2(5)   |
| Ho2              | O20 | C19 | O21              | -7.1(5)    | C4  | C3  | C8  | C7               | 0.4(5)    |
| Ho2              | O20 | C19 | C13              | 170.68(19) | C4  | C3  | C9  | O11              | -19.3(5)  |
| Ho2              | C49 | C43 | C48              | 93.5(7)    | C4  | C3  | C9  | O10              | 159.5(3)  |
| Ho2              | C49 | C43 | C44              | -83.2(8)   | C4  | C5  | C6  | N12              | 179.9(4)  |
| O51 <sup>1</sup> | C49 | C43 | C48              | -5.6(5)    | C4  | C5  | C6  | C7               | 2.6(5)    |
| O51 <sup>1</sup> | C49 | C43 | C44              | 177.6(3)   | N52 | C46 | C47 | C48              | -177.7(4) |
| O50              | C49 | C43 | C48              | 170.1(3)   | N52 | C46 | C45 | C44              | 178.0(4)  |
| O50              | C49 | C43 | C44              | -6.6(5)    | N22 | C16 | C15 | C14              | -179.4(4) |
| C27              | C28 | C23 | C24              | 1.0(4)     | C8  | C7  | C6  | N12              | -179.0(4) |
| C27              | C28 | C23 | C29              | -176.5(3)  | C8  | C7  | C6  | C5               | -1.6(5)   |
| C53              | C58 | C57 | C56              | 2.9(5)     | C8  | C3  | C4  | C5               | 0.6(5)    |

|                              |           |                              |           |
|------------------------------|-----------|------------------------------|-----------|
| C25 C24 C23 C28              | -1.3(4)   | C8 C3 C9 O11                 | 160.2(3)  |
| C25 C24 C23 C29              | 176.2(3)  | C8 C3 C9 O10                 | -21.0(5)  |
| C46 C47 C48 C43              | 0.3(6)    | C43 C44 C45 C46              | -0.9(5)   |
| C36 C35 C34 C33              | 3.6(5)    | C35 C36 C37 C38              | -2.1(5)   |
| C14 C13 C18 C17              | 0.4(5)    | C54 C53 C58 C57              | -1.8(5)   |
| C14 C13 C19 O21              | -18.2(5)  | C54 C53 C59 O61              | 174.6(3)  |
| C14 C13 C19 O20              | 163.8(3)  | C54 C53 C59 O60 <sup>1</sup> | -7.1(4)   |
| C58 C53 C54 C55              | -0.4(5)   | C54 C55 C56 N62              | -179.5(3) |
| C58 C53 C59 O61              | -6.1(4)   | C54 C55 C56 C57              | -0.5(5)   |
| C58 C53 C59 O60 <sup>1</sup> | 172.2(3)  | C6 C7 C8 C3                  | 0.1(5)    |
| C58 C57 C56 N62              | 177.3(3)  | C26 C27 C28 C23              | 0.4(4)    |
| C58 C57 C56 C55              | -1.7(5)   | C26 C25 C24 C23              | 0.1(4)    |
| N42 C36 C37 C38              | -179.3(4) | C56 C55 C54 C53              | 1.6(6)    |
| N42 C36 C35 C34              | 175.2(3)  | C34 C33 C38 C37              | -3.1(5)   |
| C47 C46 C45 C44              | -0.5(5)   | C34 C33 C39 O41              | 22.3(4)   |
| C47 C48 C43 C49              | -178.6(3) | C34 C33 C39 O40 <sup>1</sup> | -156.5(3) |
| C47 C48 C43 C44              | -1.8(5)   | C19 C13 C18 C17              | -176.2(3) |
| C13 C14 C15 C16              | -1.7(6)   | C59 C53 C58 C57              | 178.8(3)  |
| C13 C18 C17 C16              | -0.4(6)   | C59 C53 C54 C55              | 178.9(3)  |
| C18 C13 C19 O21              | 158.1(3)  | C9 C3 C4 C5                  | -179.8(3) |
| C18 C13 C19 O20              | -19.8(4)  | C9 C3 C8 C7                  | -179.2(3) |
| C18 C17 C16 C15              | -0.5(6)   | C45 C46 C47 C48              | 0.9(6)    |
| C18 C17 C16 N22              | -179.6(3) | C45 C44 C43 C49              | 178.9(3)  |
| C28 C27 C26 N32              | 175.0(3)  | C45 C44 C43 C48              | 2.1(5)    |
| C28 C27 C26 C25              | -1.5(4)   |                              |           |

<sup>1</sup>-1+X,+Y,+Z

Table S18. Hydrogen Atom Coordinates ( $\text{\AA} \times 10^4$ ) and Isotropic Displacement Parameters ( $\text{\AA}^2 \times 10^3$ ) for Ho-CP.

| Atom | x        | y        | z       | U(eq) |
|------|----------|----------|---------|-------|
| H32A | -15.41   | 6613.91  | 5349.5  | 70    |
| H32B | 1150.86  | 6090.67  | 5789.53 | 70    |
| H27  | 555.99   | 6462.56  | 4219.75 | 52    |
| H62A | -4247.98 | 9838.54  | 3328.58 | 76    |
| H62B | -5684.25 | 9422.63  | 3597.7  | 76    |
| H25  | 3105.17  | 4584.37  | 5559.46 | 55    |
| H14  | 7705.44  | 4999.68  | 1249.24 | 57    |
| H58  | -502.84  | 7027.61  | 2780.6  | 49    |
| H57  | -1712.64 | 8765.54  | 3040.99 | 57    |
| H42A | 3396.99  | -1014.45 | 5563.1  | 76    |

|      |          |           |          |        |
|------|----------|-----------|----------|--------|
| H42B | 2423.74  | -1817.76  | 5327.98  | 76     |
| H47  | -3342.14 | -241.68   | 782.74   | 62     |
| H18  | 2807.83  | 5639.29   | 737.99   | 49     |
| H28  | 1820.94  | 5309.07   | 3467.31  | 44     |
| H48  | -2422.75 | 870.72    | 1545.54  | 52     |
| H17  | 3575.42  | 6756.88   | -66.87   | 54     |
| H44  | -135.61  | 2576.88   | 221.08   | 53     |
| H24  | 4349.62  | 3425.29   | 4804.75  | 46     |
| H55  | -5858.88 | 7481.16   | 3697.95  | 62     |
| H38  | -554.98  | -253.77   | 3730.32  | 55     |
| H15  | 8467.85  | 6163.13   | 460.28   | 65     |
| H37  | 770.5    | -1544.54  | 4411.81  | 59     |
| H12A | 2083.92  | -3524.92  | 1872.06  | 105    |
| H7   | -122.34  | -1079.69  | 1929.6   | 60     |
| H4   | 5706.24  | -983.4    | 2024.25  | 50     |
| H5   | 4637.58  | -2605.56  | 1792.54  | 59     |
| H52A | -2284.52 | -89.89    | -751.14  | 77     |
| H52B | -2824.28 | -809.73   | -285.63  | 77     |
| H22A | 7485.84  | 7001.7    | -561.52  | 71     |
| H22B | 5739.24  | 7314.4    | -682.82  | 71     |
| H8   | 947.11   | 558.65    | 2133.04  | 52     |
| H35  | 3648.95  | 719.75    | 5033.1   | 50     |
| H54  | -4709.5  | 5765.8    | 3375.03  | 54     |
| H34  | 2534.1   | 1942.94   | 4261.61  | 42     |
| H45  | -1070.41 | 1481.27   | -539.37  | 58     |
| H12B | 290(70)  | -2990(50) | 1730(20) | 88(16) |



### Section 3: Photocatalytic studies

$^1\text{H-NMR}$  analysis of the photocatalytic reactions over Ln-CPs photocatalyst.

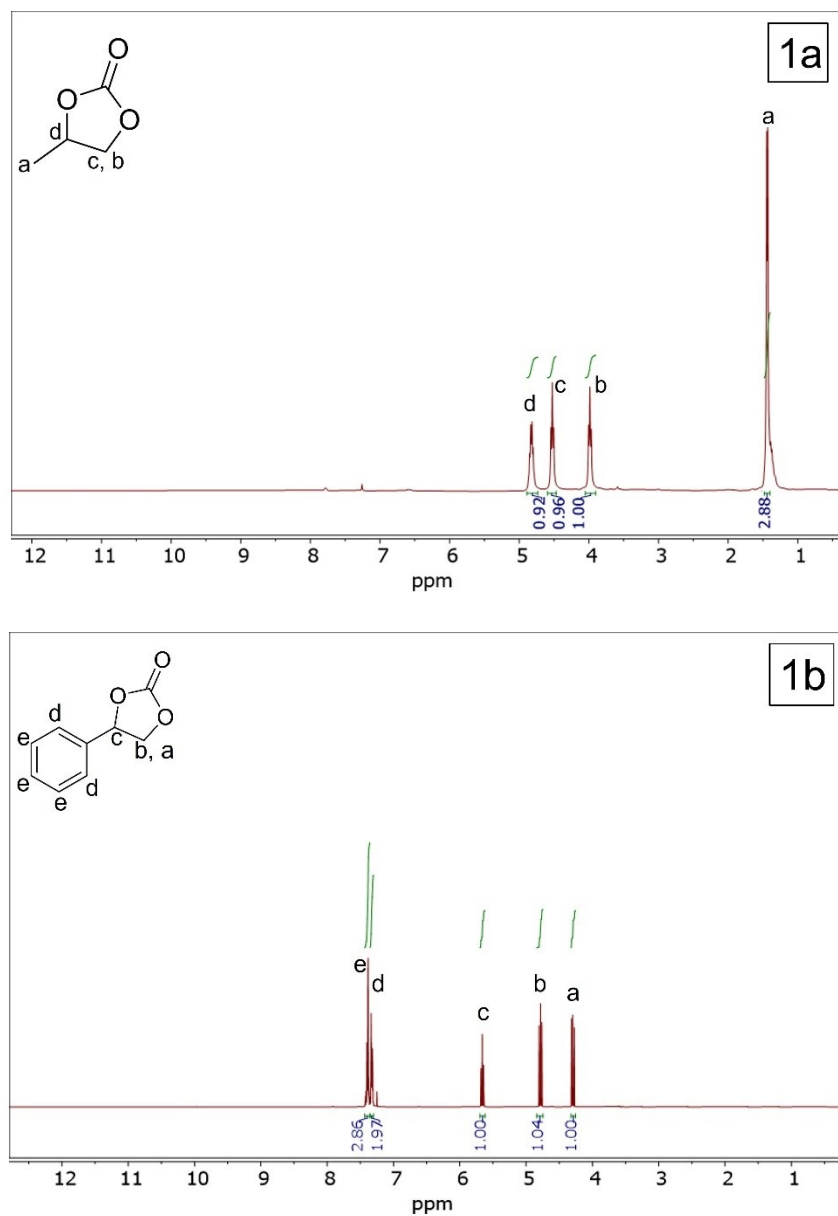

Figure S10.  $^1\text{H-NMR}$  spectrum with assigned peaks of cyclic carbonates produced using Ln-CPs . Both Ho-CP and Er-CP show full product conversions (continued).

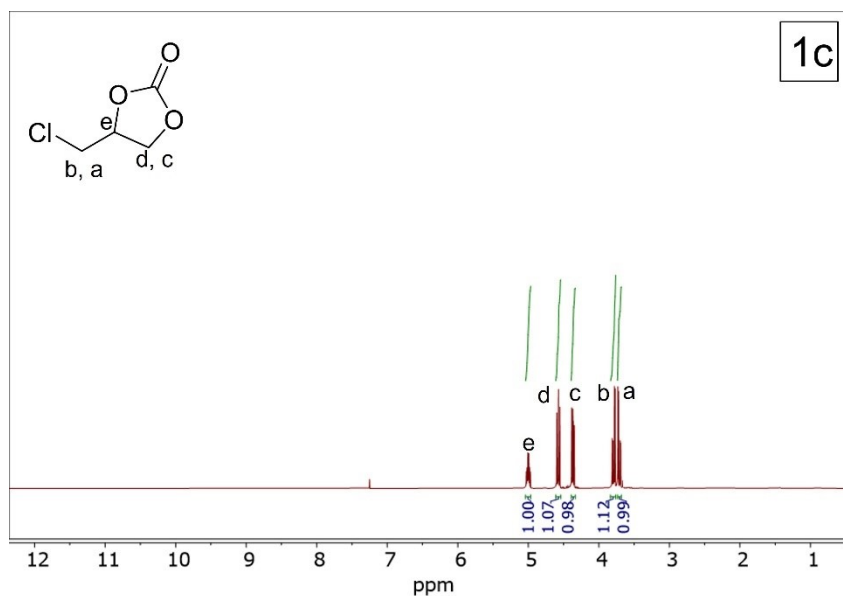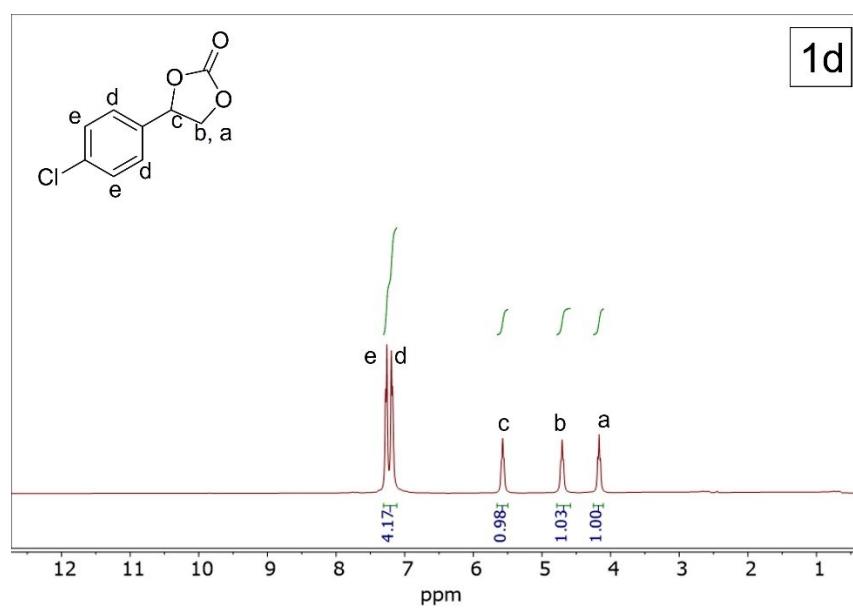

Figure S10.  $^1\text{H-NMR}$  spectrum with assigned peaks of cyclic carbonates produced using Ln-CPs. Both Ho-CP and Er-CP show full product conversions (continued).

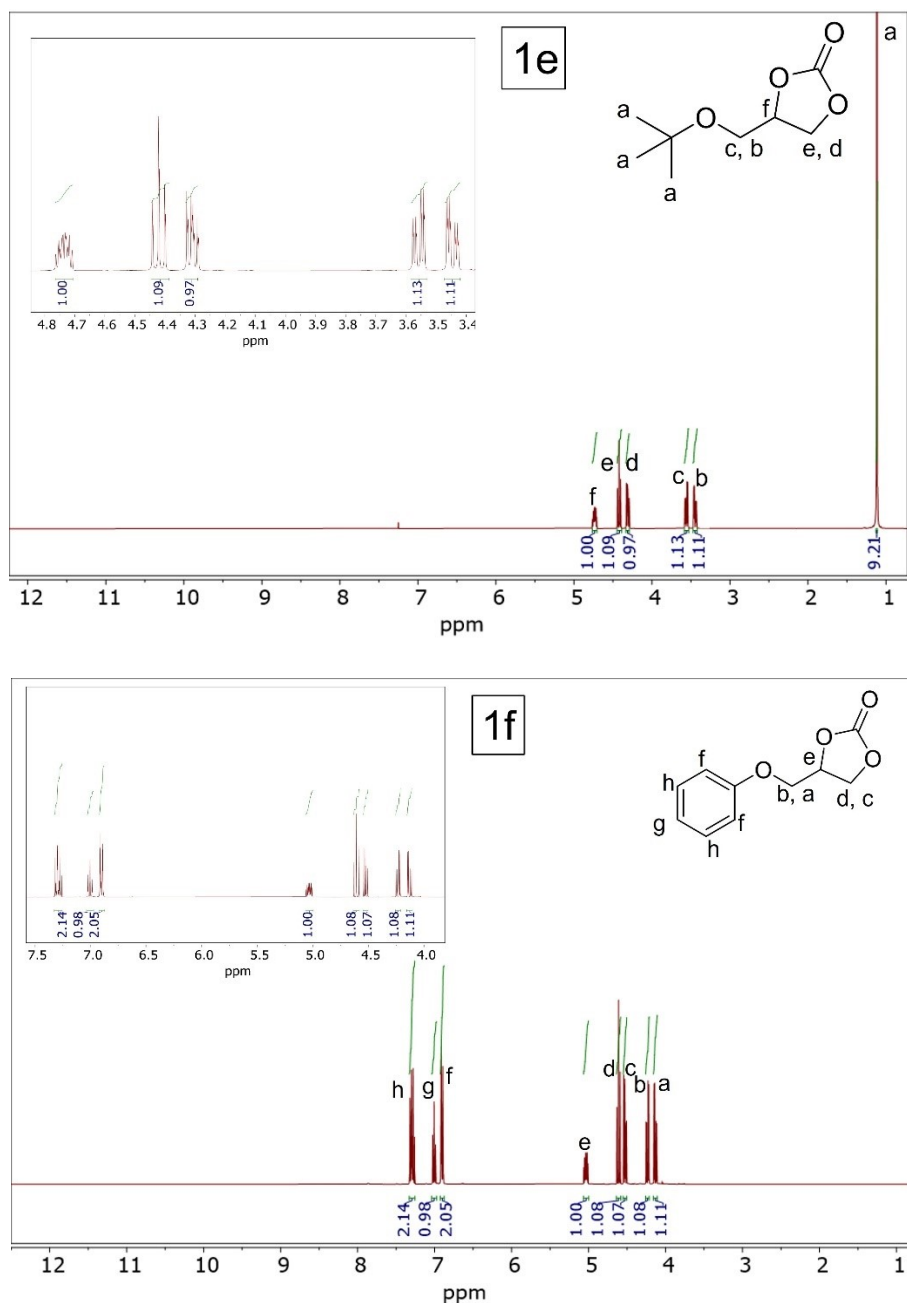

Figure S10.  $^1\text{H}$ -NMR spectrum with assigned peaks of cyclic carbonates produced using Ln-CPs. Both Ho-CP and Er-CP show full product conversions (continued).

$^{13}\text{C}$ -NMR analysis of the photocatalytic reactions over Ln-CPs photocatalyst.

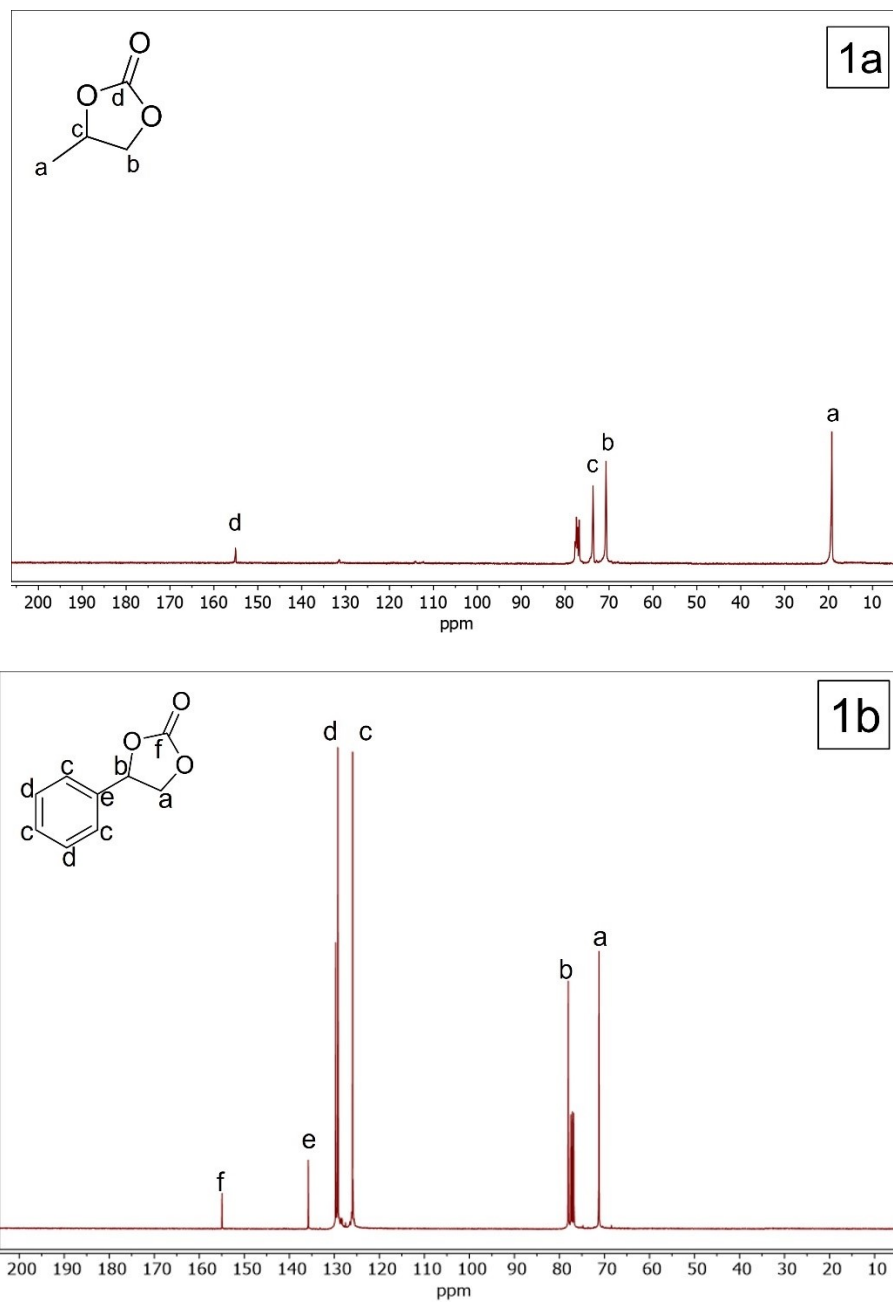

Figure S11.  $^{13}\text{C}$ -NMR spectrum with assigned peaks of cyclic carbonates produced using Ln-CPs. Both Ho-CP and Er-CP show full product conversions (continued).

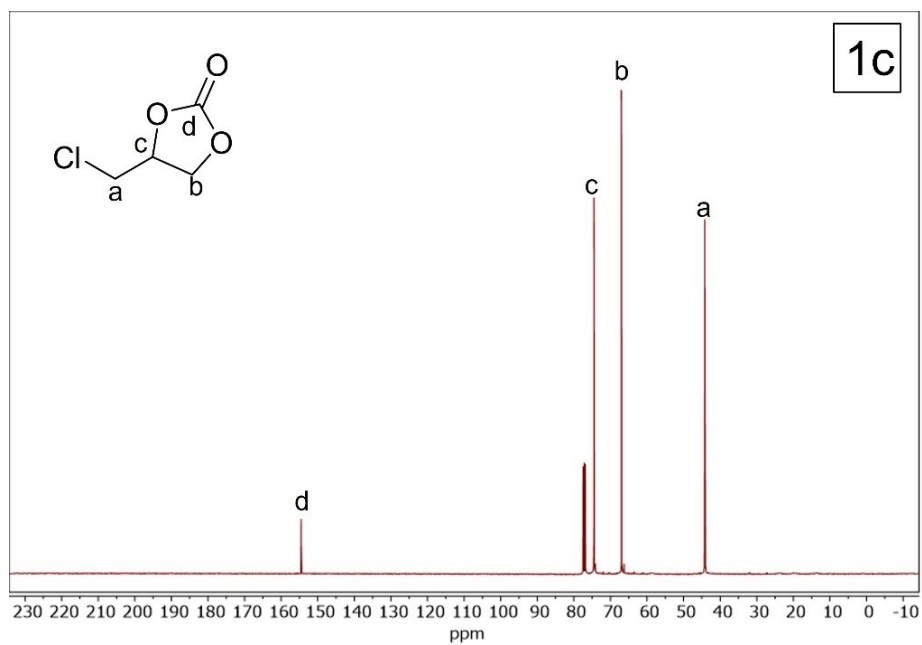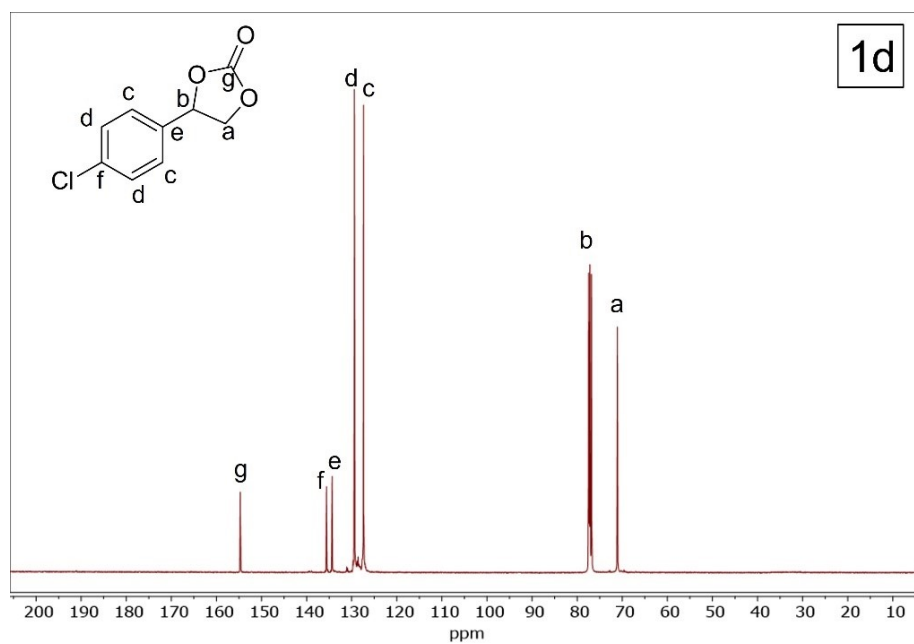

Figure S11.  $^{13}\text{C}$ -NMR spectrum with assigned peaks of cyclic carbonates produced using Ln-CPs. Both Ho-CP and Er-CP show full product conversions (continued).

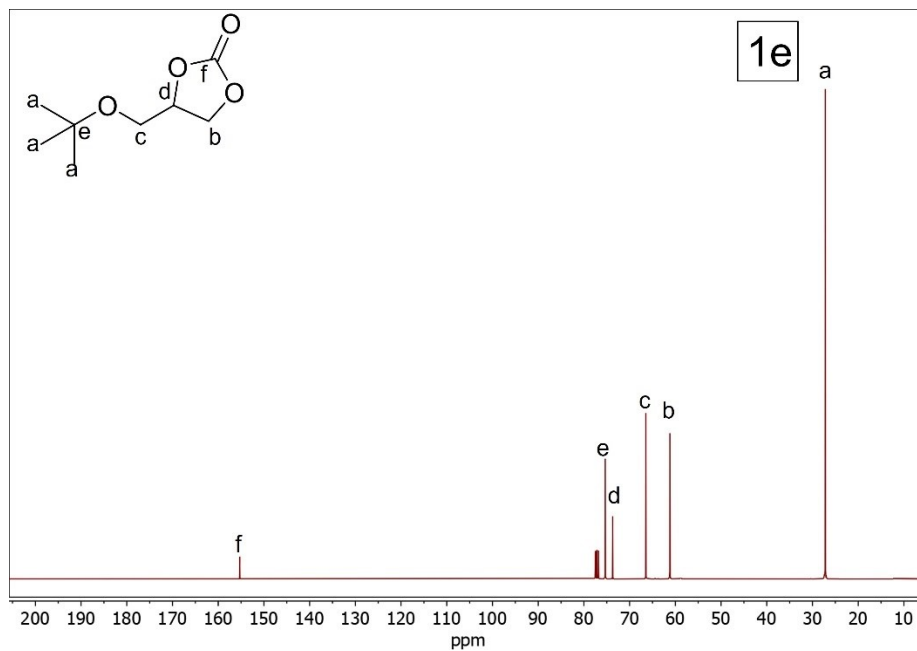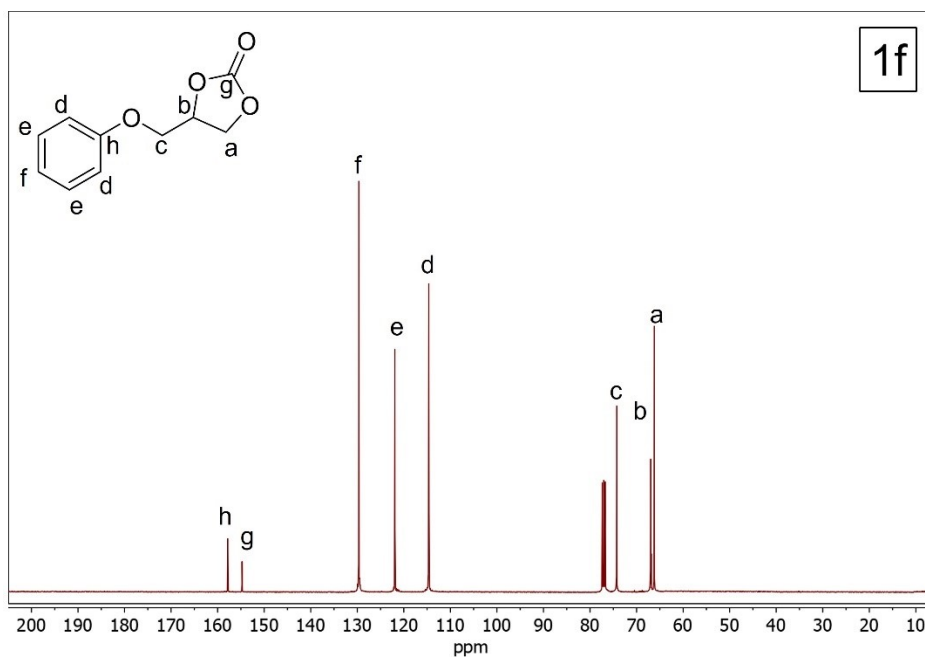

Figure S11.  $^{13}\text{C}$ -NMR spectrum with assigned peaks of cyclic carbonates produced using Ln-CPs. Both Ho-CP and Er-CP show full product conversions.

PXRD patterns of recycled Ln-CPs photocatalysts.

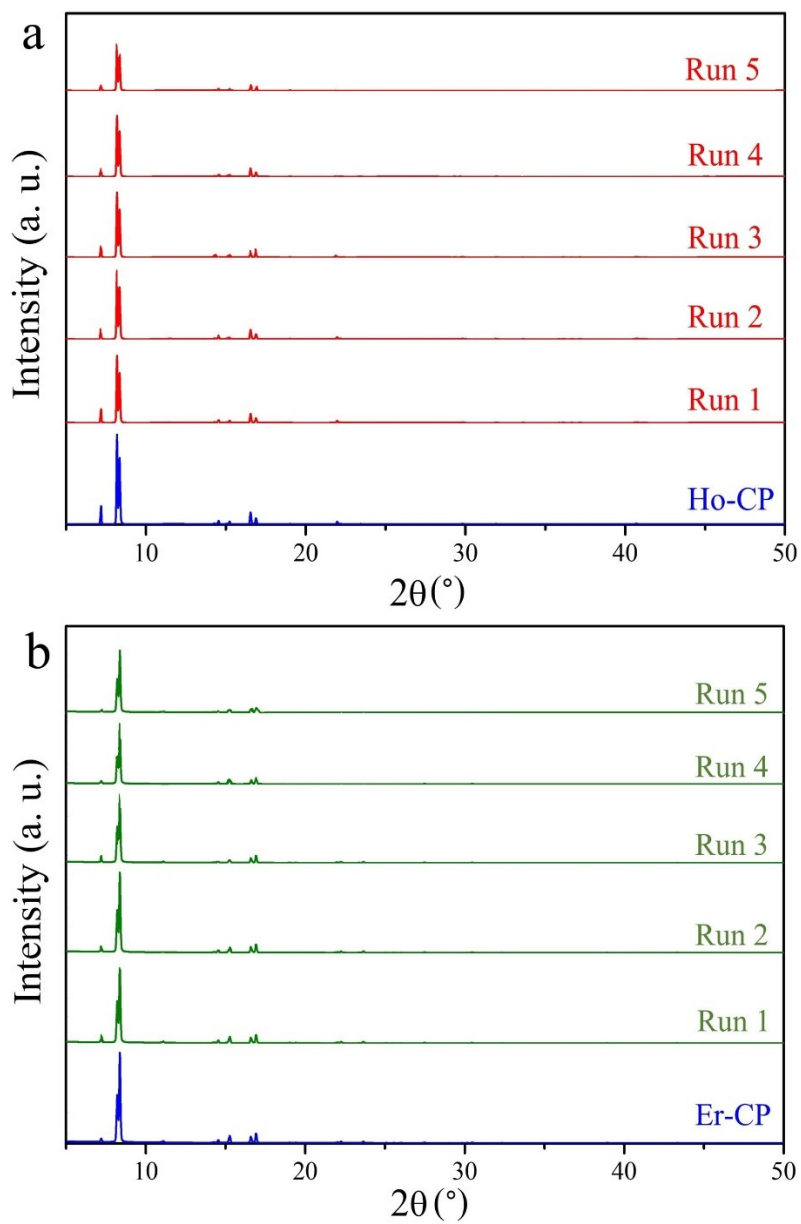

Figure S12. PXRD patterns of the regenerated Ho-CP (a) and Er-CP (b) after each recycling run.

SEM images of recycled Ln-CPs photocatalysts.

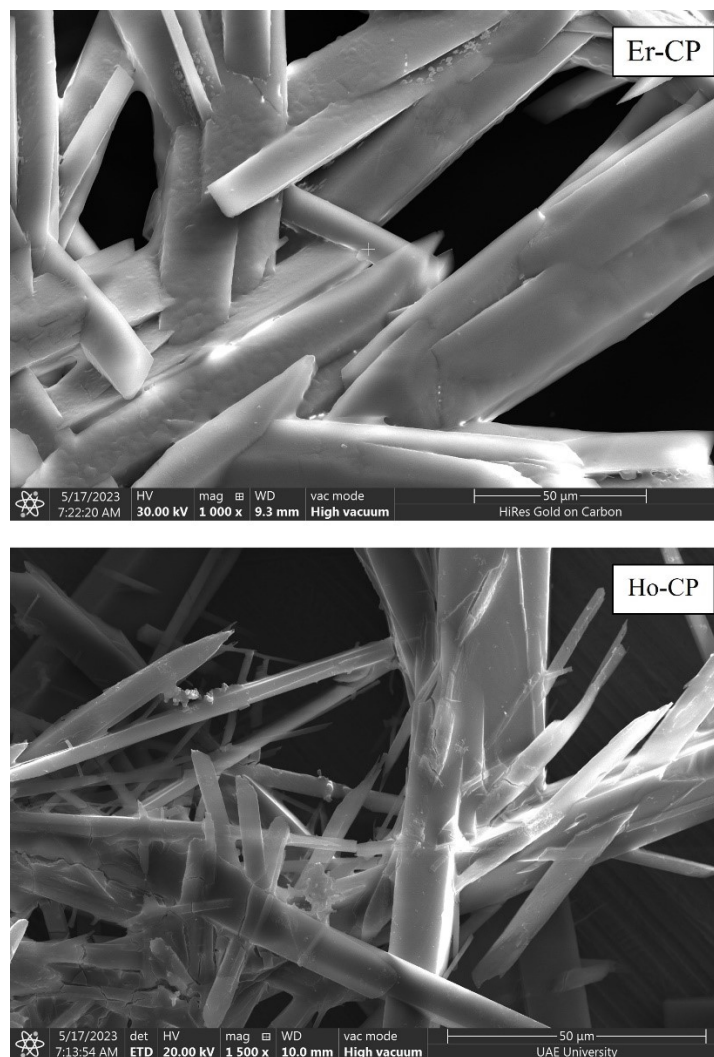

Figure S13. SEM images of recycled Ho and Er-CPs samples at 50 μm resolution.



Summary of previously published photocatalysts used in CO<sub>2</sub> cycloaddition reaction.

Table S19. Previous reports on cycloaddition of CO<sub>2</sub> photocatalytic reaction

| Photocatalyst                                                             | Substrate (epoxide) | Conversion yield (the highest obtained) | Reference |
|---------------------------------------------------------------------------|---------------------|-----------------------------------------|-----------|
| ZiSe mixed metal sulfides                                                 | Multiple epoxides   | 99.9%                                   | 1         |
| FeTPyP MOF                                                                | Styrene oxide       | 106.13 mmol/(g h).                      | 2         |
| B-N coordinated phenanthroimidazole-based zinc salen                      | Multiple epoxides   | 90.0%                                   | 3         |
| Mg-centered porphyrin-based MOF                                           | Multiple epoxides   | 99.9%                                   | 4         |
| Ti <sub>18</sub> Bi <sub>4</sub> O <sub>29</sub> BZ <sub>26</sub> cluster | Multiple epoxides   | 99.9%                                   | 5         |
| Mn-MOF (UAEU-50)                                                          | Multiple epoxides   | 90.0%                                   | 6         |
| TiO <sub>2</sub> derived from NH <sub>2</sub> -MIL-125 MOF                | Propylene oxide     | 99.9%                                   | 7         |
| Bi-gallate MOF                                                            | Multiple epoxides   | 99.9%                                   | 8         |
| Bi-PCN-224 MOF                                                            | Propylene oxide     | 99.9%                                   | 9         |
| BiNbO <sub>4</sub> /NH <sub>2</sub> -MIL-125(Ti)                          | Propylene oxide     | 74.0%                                   | 10        |
| FeNbO <sub>4</sub> /reduced graphene oxide composites                     | Propylene oxide     | 57.0%                                   | 11        |
| CoPc/TiO <sub>2</sub> hybrid materials                                    | Multiple epoxides   | 94.0%                                   | 12        |

## References

- (1) Wu, Y.; Yu, X.-F.; Du, Y.; Xia, L.; Guo, Q.; Zhang, K.; Zhang, W.; Liu, S.; Peng, Y.; Li, Z.; Yang, X. A Combination of Two Swords Thermo-Bluelight-Synergistic-Catalytic CO<sub>2</sub> Cycloaddition on ZnIn<sub>2</sub>S<sub>4</sub> Exposed Abundant of Zinc Cation Sites. *Appl. Catal. B Environ.* **2023**, *331*, 122732. <https://doi.org/10.1016/j.apcatb.2023.122732>.
- (2) Zhang, H.; Zhai, G.; Lei, L.; Zhang, C.; Liu, Y.; Wang, Z.; Cheng, H.; Zheng, Z.; Wang, P.; Dai, Y.; Huang, B. Photo-Induced Photo-Thermal Synergy Effect Leading to Efficient CO<sub>2</sub> Cycloaddition with Epoxide over a Fe-Based Metal Organic Framework. *J. Colloid Interface Sci.* **2022**, *625*, 33–40. <https://doi.org/10.1016/j.jcis.2022.05.146>.
- (3) Nayak, P.; Murali, A. C.; Pal, P. K.; Priyakumar, U. D.; Chandrasekhar, V.; Venkatasubbaiah, K. Tetra-Coordinated Boron-Functionalized Phenanthroimidazole-Based Zinc Salen as a Photocatalyst for the Cycloaddition of CO<sub>2</sub> and Epoxides. *Inorg. Chem.* **2022**, *61* (37), 14511–14516. <https://doi.org/10.1021/acs.inorgchem.2c02693>.
- (4) Das, R.; Manna, S. S.; Pathak, B.; Nagaraja, C. M. Strategic Design of Mg-Centered Porphyrin Metal–Organic Framework for Efficient Visible Light-Promoted Fixation of CO<sub>2</sub> under Ambient Conditions: Combined Experimental and Theoretical Investigation. *ACS Appl. Mater. Interfaces* **2022**, *14* (29), 33285–33296. <https://doi.org/10.1021/acsami.2c07969>.
- (5) Liu, C.; Niu, H.; Wang, D.; Gao, C.; Said, A.; Liu, Y.; Wang, G.; Tung, C.-H.; Wang, Y. S-Scheme Bi-Oxide/Ti-Oxide Molecular Hybrid for Photocatalytic Cycloaddition of Carbon Dioxide to Epoxides. *ACS Catal.* **2022**, *12* (14), 8202–8213. <https://doi.org/10.1021/acscatal.2c02256>.

- (6) Siddig, L. A.; Alzard, R. H.; Nguyen, H. L.; Göb, C. R.; Alnaqbi, M. A.; Alzamly, A. Hexagonal Layer Manganese Metal–Organic Framework for Photocatalytic CO<sub>2</sub> Cycloaddition Reaction. *ACS Omega* **2022**, *7* (11), 9958–9963. <https://doi.org/10.1021/acsomega.2c00663>.
- (7) Alzard, R. H.; Siddig, L. A.; Alhatti, N.; Abdallah, I.; Aljabri, L.; Alblooshi, A.; Alzamly, A. Titania Derived from NH<sub>2</sub>-MIL-125(Ti) Metal–Organic Framework for Selective Photocatalytic Conversion of CO<sub>2</sub> to Propylene Carbonate. *Comments Inorg. Chem.* **2022**, *0* (0), 1–15. <https://doi.org/10.1080/02603594.2022.2085692>.
- (8) Siddig, L. A.; Alzard, R. H.; Nguyen, H. L.; Alzamly, A. Cyclic Carbonate Formation from Cycloaddition of CO<sub>2</sub> to Epoxides over Bismuth Subgallate Photocatalyst. *Inorg. Chem. Commun.* **2022**, *142*, 109672. <https://doi.org/10.1016/j.inoche.2022.109672>.
- (9) Zhai, G.; Liu, Y.; Lei, L.; Wang, J.; Wang, Z.; Zheng, Z.; Wang, P.; Cheng, H.; Dai, Y.; Huang, B. Light-Promoted CO<sub>2</sub> Conversion from Epoxides to Cyclic Carbonates at Ambient Conditions over a Bi-Based Metal–Organic Framework. *ACS Catal.* **2021**, *11* (4), 1988–1994. <https://doi.org/10.1021/acscatal.0c05145>.
- (10) Bakiro, M.; Ahmed, S. H.; Alzamly, A. Cycloaddition of CO<sub>2</sub> to Propylene Oxide Using BiNbO<sub>4</sub>/NH<sub>2</sub>-MIL-125(Ti) Composites as Visible-Light Photocatalysts. *J. Environ. Chem. Eng.* **2020**, *8* (6), 104461. <https://doi.org/10.1016/j.jece.2020.104461>.
- (11) Ahmed, S. H.; Bakiro, M.; Alzamly, A. Visible-Light-Driven Photocatalytic Formation of Propylene Carbonate Using FeNbO<sub>4</sub>/Reduced Graphene Oxide Composites. *Materialia* **2020**, *12*, 100781. <https://doi.org/10.1016/j.mtla.2020.100781>.

- (12) Prajapati, P. K.; Kumar, A.; Jain, S. L. First Photocatalytic Synthesis of Cyclic Carbonates from CO<sub>2</sub> and Epoxides Using CoPc/TiO<sub>2</sub> Hybrid under Mild Conditions. *ACS Sustain. Chem. Eng.* **2018**, 6 (6), 7799–7809. <https://doi.org/10.1021/acssuschemeng.8b00755>.
